# Supplementary material for: Generation of bispecific IgG antibodies by structure-based design of an orthogonal Fab interface
Source: Springer Nature journal article supplement (doi:10.1038/nbt.2797), 2014-01-26
Supplement: 41587_2014_BFnbt2797_MOESM1_ESM.pdf [file 41587_2014_BFnbt2797_MOESM1_ESM.pdf]

**Supplementary Table 1 Rosetta multi-state designs and rational structure-based designs of both the C<sub>H</sub>1/C<sub>L</sub> and the V<sub>H</sub>/V<sub>L</sub> interfaces.**

| Design Paradigm <sup>a</sup>                                         | #Explicit Designs Tested in Each Family | Average # Residues mutated | Design Phenotype <sup>b</sup> | Expression <sup>c</sup> | Expression Mismatch WT HC/ Design LC <sup>c</sup> | Expression Mismatch WT LC/ Design HC <sup>c</sup> | Stability <sup>d</sup> |
|----------------------------------------------------------------------|-----------------------------------------|----------------------------|-------------------------------|-------------------------|---------------------------------------------------|---------------------------------------------------|------------------------|
| <b>CH1/C<math>\lambda</math> Designs</b>                             |                                         |                            |                               |                         |                                                   |                                                   |                        |
| 1                                                                    | 2                                       | 3                          | Repack                        | +                       | +                                                 | +                                                 | +                      |
| 2 (CRD2 $\beta$ )                                                    | 6                                       | 3                          | Repack                        | +                       | -                                                 | -                                                 | +                      |
| 3                                                                    | 1                                       | 2                          | Repack                        | +                       | +                                                 | +                                                 | -                      |
| 4                                                                    | 1                                       | 2                          | Charge                        | +                       | +                                                 | +                                                 | +                      |
| 5                                                                    | 4                                       | 2                          | Charge                        | +                       | +                                                 | -                                                 | +                      |
| 6                                                                    | 2                                       | 3                          | Repack                        | +                       | +                                                 | +                                                 | -                      |
| 7                                                                    | 4                                       | 2                          | Charge                        | -                       | n.d. <sup>e</sup>                                 | n.d.                                              | n.d.                   |
| 8                                                                    | 3                                       | 6                          | Repack                        | +/-                     | -                                                 | -                                                 | +                      |
| 9                                                                    | 1                                       | 7                          | Repack                        | +                       | -                                                 | -                                                 | -                      |
| 10                                                                   | 1                                       | 8                          | Repack                        | -                       | n.d.                                              | n.d.                                              | n.d.                   |
| 11                                                                   | 1                                       | 6                          | Repack                        | -                       | n.d.                                              | n.d.                                              | n.d.                   |
| 12                                                                   | 1                                       | 10                         | Both                          | -                       | n.d.                                              | n.d.                                              | n.d.                   |
| 13                                                                   | 2                                       | 5                          | Both                          | +                       | +                                                 | -                                                 | -                      |
| 14                                                                   | 1                                       | 18                         | Both                          | -                       | n.d.                                              | n.d.                                              | n.d.                   |
| 15                                                                   | 2                                       | 18                         | Both                          | -                       | n.d.                                              | n.d.                                              | n.d.                   |
| 16                                                                   | 1                                       | 19                         | Both                          | -                       | n.d.                                              | n.d.                                              | n.d.                   |
| 17                                                                   | 2                                       | 18                         | Both                          | -                       | n.d.                                              | n.d.                                              | n.d.                   |
| 18                                                                   | 2                                       | 9                          | Both                          | +                       | +                                                 | +                                                 | +                      |
| 19                                                                   | 4                                       | 16                         | Both                          | -                       | n.d.                                              | n.d.                                              | n.d.                   |
| 20                                                                   | 1                                       | 13                         | Both                          | -                       | n.d.                                              | n.d.                                              | n.d.                   |
| 1+5 (CRD1)                                                           | 1                                       | 5                          | Both                          | +                       | +                                                 | -                                                 | +                      |
| <b>CH1/C<math>\lambda</math> CRD2<math>\beta</math> optimization</b> |                                         |                            |                               |                         |                                                   |                                                   |                        |
| 1                                                                    | 2                                       | 4                          | Repack                        | +                       | -                                                 | -                                                 | +                      |
| 2                                                                    | 2                                       | 3                          | Repack                        | +                       | -                                                 | -                                                 | +                      |
| 3                                                                    | 4                                       | 4                          | Repack                        | +                       | -                                                 | -                                                 | ++                     |
| <b>VH/VL Designs</b>                                                 |                                         |                            |                               |                         |                                                   |                                                   |                        |
| 1                                                                    | 4                                       | 2                          | Charge                        | +                       | -                                                 | +                                                 | +                      |
| 2                                                                    | 8                                       | 2                          | Charge                        | +                       | -                                                 | +                                                 | +                      |
| 3                                                                    | 1                                       | 2                          | Repack                        | -                       | n.d.                                              | n.d.                                              | n.d.                   |
| 4                                                                    | 1                                       | 2                          | Repack                        | -                       | n.d.                                              | n.d.                                              | n.d.                   |
| 5                                                                    | 3                                       | 2                          | Repack                        | -                       | n.d.                                              | n.d.                                              | n.d.                   |
| 6 (VRD2)                                                             | 3                                       | 2                          | Charge                        | +                       | n.d.                                              | n.d.                                              | +                      |
| 1+2 (VRD1)                                                           | 1                                       | 4                          | Charge                        | +                       | -                                                 | -                                                 | +                      |

<sup>a</sup>Each paradigm is based on a similar design principle focused around a set of residues where variations within each paradigm may include variances in one or more amino acid changes to search for the best combination. <sup>b</sup>Design phenotypes could rudimentarily be categorized as a repacking of residues within the C<sub>H</sub>1/C<sub>L</sub> or V<sub>H</sub>/V<sub>L</sub> interface (repack) or as a swap or introduction of charge-charge interactions (charge) or both (both). <sup>c</sup>Expression and assembly similar to (+) or worse than (-) WT protein and if worse, then additional measurements were not performed. <sup>d</sup>Stability near WT based on residual activity following thermal challenge at temperatures ranging from 50-80 °C. <sup>e</sup>Not determined (n.d.).

**Supplementary Table 2 Ratio of the relative mass spectrometric intensity of two light chains when expressed with a single heavy chain**

| LC1                                                                                                    | LC2                                    | HC                                        | %Assembly <sup>a</sup><br>(LC1/HC) | %Assembly <sup>a</sup><br>(LC2/HC) | Expression<br>(µg/mL) |
|--------------------------------------------------------------------------------------------------------|----------------------------------------|-------------------------------------------|------------------------------------|------------------------------------|-----------------------|
| <b>C<sub>H1</sub>/C<sub>L</sub> Specificity Designs in IgG-lacking V<sub>H</sub>/V<sub>L</sub></b>     |                                        |                                           |                                    |                                    |                       |
| Cλ <sub>CRD1</sub> LC                                                                                  | Cλ <sub>WT</sub> LC                    | CH1 <sub>WT</sub> HC                      | 36                                 | 64                                 | 24                    |
| Cλ <sub>CRD1</sub> LC                                                                                  | Cλ <sub>WT</sub> LC                    | CH1 <sub>CRD1</sub> HC                    | 96                                 | 4                                  | 18                    |
| Cλ <sub>CRD1</sub> LC                                                                                  | CK <sub>WT</sub> LC                    | CH1 <sub>WT</sub> HC                      | 58                                 | 42                                 | 28                    |
| Cλ <sub>CRD1</sub> LC                                                                                  | CK <sub>WT</sub> LC                    | CH1 <sub>CRD1</sub> HC                    | 100                                | 0                                  | 61                    |
| Cλ <sub>CRD2</sub> LC                                                                                  | Cλ <sub>WT</sub> LC                    | CH1 <sub>WT</sub> HC                      | 7±3                                | 93±3                               | 29±18                 |
| Cλ <sub>CRD2</sub> LC                                                                                  | Cλ <sub>WT</sub> LC                    | CH1 <sub>CRD2</sub> HC                    | 99.7±0.3                           | 0.3±0.3                            | 46±30                 |
| Cλ <sub>CRD2</sub> LC                                                                                  | CK <sub>WT</sub> LC                    | CH1 <sub>WT</sub> HC                      | 5±5                                | 95±5                               | 47±27                 |
| Cλ <sub>CRD2</sub> LC                                                                                  | CK <sub>WT</sub> LC                    | CH1 <sub>CRD2</sub> HC                    | 100±0.1                            | 0±0.1                              | 60±30                 |
| <b>C<sub>H1</sub>/C<sub>L</sub> Specificity Designs in IgG with V<sub>H</sub>/V<sub>L</sub></b>        |                                        |                                           |                                    |                                    |                       |
| VL <sub>WT</sub> Cλ <sub>CRD1</sub> LC                                                                 | VL <sub>WT</sub> CK <sub>WT</sub> LC   | VH <sub>WT</sub> CH1 <sub>WT</sub> HC     | 6                                  | 100                                | 87                    |
| VL <sub>WT</sub> Cλ <sub>CRD1</sub> LC                                                                 | VL <sub>WT</sub> CK <sub>WT</sub> LC   | VH <sub>WT</sub> CH1 <sub>CRD1</sub> HC   | 15                                 | 100                                | 104                   |
| VL <sub>WT</sub> Cλ <sub>CRD2</sub> LC                                                                 | VL <sub>WT</sub> Cλ <sub>WT</sub> LC   | VH <sub>WT</sub> CH1 <sub>WT</sub> HC     | 50                                 | 50                                 | 29                    |
| VL <sub>WT</sub> Cλ <sub>CRD2</sub> LC                                                                 | VL <sub>WT</sub> Cλ <sub>WT</sub> LC   | VH <sub>WT</sub> CH1 <sub>CRD2</sub> HC   | 79                                 | 21                                 | 28                    |
| VL <sub>WT</sub> Cλ <sub>CRD2</sub> LC                                                                 | VL <sub>WT</sub> CK <sub>WT</sub> LC   | VH <sub>WT</sub> CH1 <sub>WT</sub> HC     | 78                                 | 22                                 | 31                    |
| VL <sub>WT</sub> Cλ <sub>CRD2</sub> LC                                                                 | VL <sub>WT</sub> CK <sub>WT</sub> LC   | VH <sub>WT</sub> CH1 <sub>CRD2</sub> HC   | 79                                 | 21                                 | 19                    |
| <b>V<sub>H</sub>/V<sub>L</sub> Specificity Designs</b>                                                 |                                        |                                           |                                    |                                    |                       |
| VL <sub>WT</sub> Cλ <sub>WT</sub> LC                                                                   | VL <sub>WT</sub> CK <sub>WT</sub> LC   | VH <sub>WT</sub> CH1 <sub>WT</sub> HC     | 18                                 | 82                                 | 69                    |
| VL <sub>VRD1</sub> Cλ <sub>WT</sub> LC                                                                 | VL <sub>WT</sub> CK <sub>WT</sub> LC   | VH <sub>WT</sub> CH1 <sub>WT</sub> HC     | 10                                 | 90                                 | 73                    |
| VL <sub>VRD1</sub> Cλ <sub>WT</sub> LC                                                                 | VL <sub>WT</sub> CK <sub>WT</sub> LC   | VH <sub>VRD1</sub> CH1 <sub>WT</sub> HC   | 61                                 | 39                                 | 108                   |
| VL <sub>VRD1</sub> CK <sub>WT</sub> LC                                                                 | VL <sub>WT</sub> Cλ <sub>WT</sub> LC   | VH <sub>WT</sub> CH1 <sub>WT</sub> HC     | 40                                 | 60                                 | 132                   |
| VL <sub>VRD1</sub> CK <sub>WT</sub> LC                                                                 | VL <sub>WT</sub> Cλ <sub>WT</sub> LC   | VH <sub>VRD1</sub> CH1 <sub>WT</sub> HC   | 69                                 | 31                                 | 112                   |
| VL <sub>VRD2</sub> Cλ <sub>WT</sub> LC                                                                 | VL <sub>WT</sub> CK <sub>WT</sub> LC   | VH <sub>WT</sub> CH1 <sub>WT</sub> HC     | 39                                 | 61                                 | 94                    |
| VL <sub>VRD2</sub> Cλ <sub>WT</sub> LC                                                                 | VL <sub>WT</sub> CK <sub>WT</sub> LC   | VH <sub>VRD2</sub> CH1 <sub>WT</sub> HC   | 56                                 | 44                                 | 105                   |
| VL <sub>VRD2</sub> Cλ <sub>WT</sub> LC                                                                 | VL <sub>VRD1</sub> CK <sub>WT</sub> LC | VH <sub>VRD1</sub> CH1 <sub>WT</sub> HC   | 23                                 | 77                                 | 95                    |
| VL <sub>VRD2</sub> Cλ <sub>WT</sub> LC                                                                 | VL <sub>VRD1</sub> CK <sub>WT</sub> LC | VH <sub>VRD2</sub> CH1 <sub>WT</sub> HC   | 71                                 | 29                                 | 71                    |
| <b>Combination of V<sub>H</sub>/V<sub>L</sub> and C<sub>H1</sub>/C<sub>L</sub> Specificity Designs</b> |                                        |                                           |                                    |                                    |                       |
| VL <sub>VRD1</sub> Cλ <sub>CRD2</sub> LC                                                               | VL <sub>WT</sub> Cλ <sub>WT</sub> LC   | VH <sub>WT</sub> CH1 <sub>WT</sub> HC     | 15±18                              | 85±18                              | 42±11                 |
| VL <sub>VRD1</sub> Cλ <sub>CRD2</sub> LC                                                               | VL <sub>WT</sub> Cλ <sub>WT</sub> LC   | VH <sub>VRD1</sub> CH1 <sub>CRD2</sub> HC | 73±12                              | 27±12                              | 55±26                 |
| VL <sub>VRD2</sub> Cλ <sub>CRD2</sub> LC                                                               | VL <sub>WT</sub> Cλ <sub>WT</sub> LC   | VH <sub>WT</sub> CH1 <sub>WT</sub> HC     | 30±24                              | 70±24                              | 49±17                 |
| VL <sub>VRD2</sub> Cλ <sub>CRD2</sub> LC                                                               | VL <sub>WT</sub> Cλ <sub>WT</sub> LC   | VH <sub>VRD2</sub> CH1 <sub>CRD2</sub> HC | 84±10                              | 16±10                              | 51±28                 |
| VL <sub>VRD1</sub> Cλ <sub>CRD2</sub> LC                                                               | VL <sub>VRD2</sub> CK <sub>WT</sub> LC | VH <sub>VRD2</sub> CH1 <sub>WT</sub> HC   | 26±23                              | 74±23                              | 53±29                 |
| VL <sub>VRD1</sub> Cλ <sub>CRD2</sub> LC                                                               | VL <sub>VRD2</sub> CK <sub>WT</sub> LC | VH <sub>VRD1</sub> CH1 <sub>CRD2</sub> HC | 73±6                               | 27±6                               | 73±41                 |
| VL <sub>VRD1</sub> Cλ <sub>CRD2</sub> LC                                                               | VL <sub>VRD2</sub> Cλ <sub>WT</sub> LC | VH <sub>VRD2</sub> CH1 <sub>WT</sub> HC   | 9±1                                | 91±1                               | 75±4                  |
| VL <sub>VRD1</sub> Cλ <sub>CRD2</sub> LC                                                               | VL <sub>VRD2</sub> Cλ <sub>WT</sub> LC | VH <sub>VRD1</sub> CH1 <sub>CRD2</sub> HC | 89±4                               | 11±4                               | 76±16                 |

<sup>a</sup>The percent assembly was calculated based on the relative area under the deconvoluted mass spectrometry peaks (i.e., proportional to the number of counts hitting the detector) of each of the LCs co-purified bound to the HC prior to mass spectrometry analysis. Purified samples were reduced with DTT prior to analysis. <sup>b</sup>Green highlighted cells indicate the matched LC and HC pairs. The mass spectrometry results are highlighted in green if the matched pair was >50% of

the assembled product when expressed with the mismatched LC and red if the specific assembly was  $\leq 50\%$ .

**Supplemental Table 3 EpiMatrix Immunogenicity Prediction<sup>a</sup>**

| <b>Designs</b>                | <b>Protein Sequence<sup>b</sup></b> | <b>Length (#residues)</b> | <b>EpiMatrix Hits<sup>c</sup></b> | <b>EpiMatrix Score<sup>d</sup></b> |
|-------------------------------|-------------------------------------|---------------------------|-----------------------------------|------------------------------------|
| <b>C<sub>H</sub>1 Designs</b> |                                     |                           |                                   |                                    |
| Wild-Type                     | IgG1 (-V <sub>H</sub> )             | 329                       | 131                               | -12.1                              |
| CRD1                          | IgG1 (-V <sub>H</sub> )             | 329                       | 130                               | -12.3                              |
| CRD2                          | IgG1 (-V <sub>H</sub> )             | 329                       | 128                               | -14.3                              |
| <b>C<sub>λ</sub> Designs</b>  |                                     |                           |                                   |                                    |
| Wild-Type                     | C <sub>λ</sub> (-V <sub>L</sub> )   | 105                       | 29                                | -33.7                              |
| CRD1                          | C <sub>λ</sub> (-V <sub>L</sub> )   | 105                       | 22                                | -53.4                              |
| CRD2                          | C <sub>λ</sub> (-V <sub>L</sub> )   | 105                       | 26                                | -42.1                              |
| <b>V<sub>H</sub> Designs</b>  |                                     |                           |                                   |                                    |
| Wild-Type                     | IgG1                                | 448                       | 204                               | 5.7                                |
| VRD1                          | IgG1                                | 448                       | 202                               | 4.6                                |
| VRD2                          | IgG1                                | 448                       | 202                               | 4.2                                |
| <b>V<sub>L</sub> Designs</b>  |                                     |                           |                                   |                                    |
| Wild-Type                     | Kappa LC                            | 212                       | 83                                | -6.2                               |
| VRD1                          | Kappa LC                            | 212                       | 80                                | -9.9                               |
| VRD2                          | Kappa LC                            | 212                       | 85                                | -4.8                               |

<sup>a</sup>A standard set of human major histocompatibility alleles were used for the analysis. <sup>b</sup>Protein Sequence indicates the entire protein that was entered into the program for analysis. IgG1 (-V<sub>H</sub>) and C<sub>λ</sub> (-V<sub>L</sub>) indicates that only the constant region IgG and C<sub>λ</sub> sequences were input into the program for analysis. <sup>c</sup>EpiMatrix Hits indicate the number of EpiMatrix Z scores above a certain threshold criteria. <sup>d</sup>EpiMatrix Score is derived from the number and intensity of the EpiMatrix Hits normalized by the protein length. Based on the EpiMatrix manual, numbers above 20 or 30 are considered to have a high immunogenicity risk, while numbers below -20 are deemed to have a low immunogenicity risk.

**Supplementary Table 4 Structure determination statistics**

|                                       | Wild-type<br>C <sub>H1</sub> /C <sub>λ</sub><br>(4LLD) | CRD1<br>C <sub>H1</sub> /C <sub>λ</sub><br>(4LLM) | CRD2β<br>C <sub>H1</sub> /C <sub>λ</sub><br>(4LLQ) | Wild-type<br>Pertuzumab<br>Fab (C <sub>λ</sub> )<br>(4LLU)                                                | VRD2<br>Pertuzumab<br>Fab (C <sub>λ</sub> )<br>(4LLW) | VRD1_CRD2<br>Pertuzumab<br>Fab (C <sub>λ</sub> )<br>(4LLY) <sup>a</sup>      |
|---------------------------------------|--------------------------------------------------------|---------------------------------------------------|----------------------------------------------------|-----------------------------------------------------------------------------------------------------------|-------------------------------------------------------|------------------------------------------------------------------------------|
| Crystallization conditions            | 35%<br>PEG 4K                                          | 40% PEG<br>6K, 10mM<br>tri-Sodium<br>Citrate      | 39%<br>PEG 6K,<br>5mM<br>tri-Sodium<br>Citrate     | 100mM<br>Sodium<br>Acetate<br>pH 4.5,<br>10% MPD,<br>30% PEG<br>2000 MME,<br>200mM<br>Ammonium<br>Sulfate | 15% PEG<br>8K, 200mM<br>Ammonium<br>Sulfate           | 100mM Na<br>Citrate<br>tribasic pH 5,<br>30%<br>Jeffamine<br>ED-2001<br>pH 7 |
| Cryoprotectant                        | 20%<br>PEG 400                                         | 20%<br>Ethylene<br>glycol                         | 20%<br>PEG 400                                     | 16% Glycerol                                                                                              | 20%<br>Ethylene<br>glycol                             | 20% Glycerol                                                                 |
| <b>Data collection</b>                |                                                        |                                                   |                                                    |                                                                                                           |                                                       |                                                                              |
| Resolution range<br>(outer shell) (Å) | 66.93-1.19<br>(1.25-1.19) <sup>b</sup>                 | 71.50-1.75<br>(1.85-1.75)                         | 71.22-1.42<br>(1.50-1.42)                          | 19.90-2.16<br>(2.28-2.16)                                                                                 | 36.32-1.95<br>(2.06-1.95)                             | 86.84-1.60<br>(1.69-1.60)                                                    |
| Space Group                           | P2 <sub>1</sub> 2 <sub>1</sub> 2 <sub>1</sub>          | P2 <sub>1</sub> 2 <sub>1</sub> 2 <sub>1</sub>     | P2 <sub>1</sub> 2 <sub>1</sub> 2 <sub>1</sub>      | C2                                                                                                        | P2 <sub>1</sub>                                       | P1                                                                           |
| a (Å)                                 | 43.08                                                  | 44.51                                             | 42.74                                              | 210.02                                                                                                    | 85.60                                                 | 52.83                                                                        |
| b (Å)                                 | 65.84                                                  | 61.39                                             | 62.59                                              | 69.74                                                                                                     | 71.18                                                 | 52.91                                                                        |
| c (Å)                                 | 66.93                                                  | 71.50                                             | 71.22                                              | 70.83                                                                                                     | 90.92                                                 | 89.58                                                                        |
| α (°)                                 | 90                                                     | 90                                                | 90                                                 | 90                                                                                                        | 90                                                    | 76.89                                                                        |
| β (°)                                 | 90                                                     | 90                                                | 90                                                 | 98.75                                                                                                     | 99.28                                                 | 84.34                                                                        |
| γ (°)                                 | 90                                                     | 90                                                | 90                                                 | 90                                                                                                        | 90                                                    | 85.54                                                                        |
| Completeness(%)                       | 97.6 (95.6)                                            | 99.8 (99.9)                                       | 99.3 (98.6)                                        | 97.4 (94.5)                                                                                               | 97.9 (97.2)                                           | 95.9 (94.3)                                                                  |
| Mean redundancy                       | 7.2 (7.0)                                              | 7.0 (7.2)                                         | 7.2 (7.2)                                          | 3.6 (3.6)                                                                                                 | 3.8 (3.8)                                             | 4.0 (3.8)                                                                    |
| R <sub>sym</sub> (%) <sup>c</sup>     | 4.3 (52.8)                                             | 7.6 (50.3)                                        | 5.8 (52.7)                                         | 17.5 (67.0)                                                                                               | 11.3 (71.9)                                           | 8.2 (54.9)                                                                   |
| Mean I/sd(I)                          | 23.8 (3.6)                                             | 19.1 (5.6)                                        | 19.1 (3.7)                                         | 5.0 (1.9)                                                                                                 | 6.0 (1.7)                                             | 9.8 (1.8)                                                                    |
| <b>Refinement</b>                     |                                                        |                                                   |                                                    |                                                                                                           |                                                       |                                                                              |
| Resolution (Å)                        | 46.93-1.19                                             | 37.78-1.75                                        | 47.01-1.42                                         | 19.90-2.16                                                                                                | 35.59-1.95                                            | 43.42-1.60                                                                   |
| R (%) <sup>d</sup>                    | 17.9                                                   | 17.9                                              | 19.0                                               | 22.5                                                                                                      | 21.2                                                  | 19.9                                                                         |
| R <sub>free</sub> (%) <sup>e</sup>    | 19.3                                                   | 22.0                                              | 22.0                                               | 27.3                                                                                                      | 26.2                                                  | 22.9                                                                         |
| rmsd bond lengths (Å)                 | 0.007                                                  | 0.009                                             | 0.012                                              | 0.011                                                                                                     | 0.011                                                 | 0.022                                                                        |
| rmsd angles (°)                       | 1.3                                                    | 1.3                                               | 1.3                                                | 1.3                                                                                                       | 1.5                                                   | 1.5                                                                          |
| Core Ramachandran                     | 98.0                                                   | 98.5                                              | 98.5                                               | 95.5                                                                                                      | 96.6                                                  | 97.2                                                                         |

|                             |     |     |     |                  |         |                     |
|-----------------------------|-----|-----|-----|------------------|---------|---------------------|
| (%)                         |     |     |     |                  |         |                     |
| Disallowed Ramachandran (%) | 0.0 | 0.0 | 0.0 | 0.0              | 0.1     | 0.0                 |
| Amino Acids                 | 200 | 202 | 200 | 856              | 843     | 858                 |
| Chains                      | A,B | A,B | A,B | A,B,C,D          | A,B,C,D | A,B,C,D             |
| Chemical Components         |     |     |     | Acetate, Sulfate | Sulfate | Magnesium, Glycerol |
| Waters                      | 330 | 139 | 203 | 245              | 360     | 581                 |

<sup>a</sup>Structure was a merger of two datasets. <sup>b</sup>Values in parentheses are for the highest resolution shell. <sup>c</sup> $R_{\text{sym}} = \sum |I - \langle I \rangle| / \sum I$ , where  $I$  is the observed intensity and  $\langle I \rangle$  is the average intensity over all observations of symmetry-related reflections. <sup>d</sup> $R = \frac{\sum ||F_{\text{obs}}| - |F_{\text{calc}}||}{\sum |F_{\text{obs}}|}$ , where  $|F_{\text{obs}}|$  and  $|F_{\text{calc}}|$  are the observed and calculated structure factor amplitudes, respectively. <sup>e</sup> $R_{\text{free}}$  was calculated from a randomly chosen subset of 5% of the reflections.

**Supplementary Table 5 Interface positions considered for design**

| $C_H1$ position | $C_L$ position | $V_H$ position | $V_L$ position |
|-----------------|----------------|----------------|----------------|
| 120             | 116            | 37             | 36             |
| 122             | 118            | 39             | 38             |
| 124             | 121            | 44             | 43             |
| 139             | 123            | 45             | 44             |
| 141             | 124            | 47             | 46             |
| 143             | 129            | 89             | 49             |
| 145             | 131            | 91             | 85             |
| 146             | 133            | 93             | 87             |
| 169             | 135            | 103            | 98             |
| 172             | 137            | 106            | 100            |
| 174             | 160            |                | 101            |
| 175             | 162            |                |                |
| 177             | 165            |                |                |
| 186             | 167            |                |                |
| 188             | 168            |                |                |
| 190             | 174            |                |                |
| 192             | 176            |                |                |
| 221             | 178            |                |                |
|                 | 180            |                |                |

This table lists positions tested for mutation in multistate design. The first column denotes  $C_H1$  residues from PDB 3TV3 that were allowed to mutate in at least one multistate design experiment.

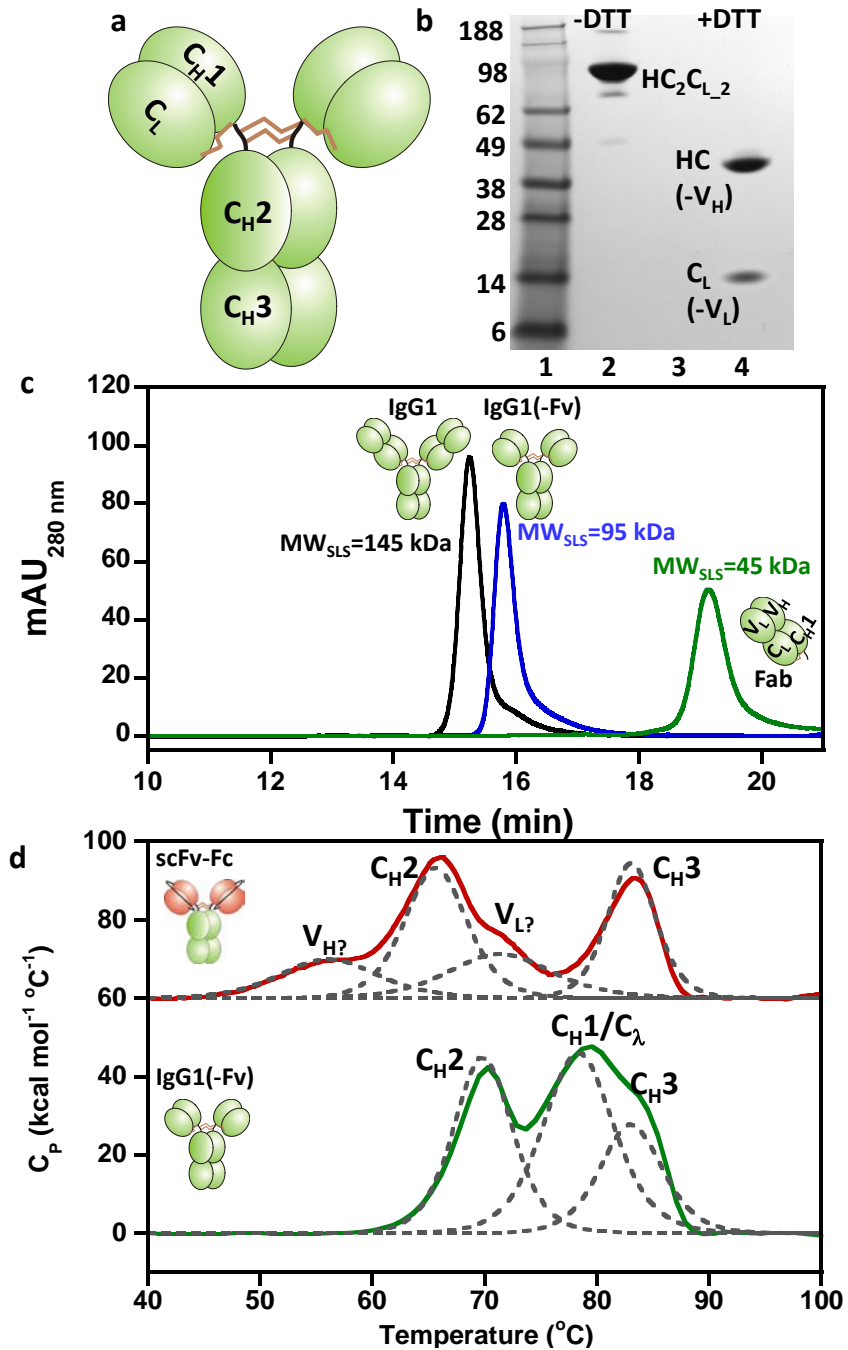



**Supplementary Figure 1** Properties of the IgG1(-Fv) protein that lacks V<sub>H</sub> and V<sub>L</sub> domains and was used for screening the C<sub>H</sub>1/C<sub>L</sub> interface redesigns. (a) Schematic diagram of the domain architecture of the IgG1(-Fv) protein. Ovals represent the individual Ig-domains and the brown lines represent the disulfide bonds formed in the hinge and between the C<sub>H</sub>1 and C<sub>L</sub> domains. (b) SDS-PAGE analysis of the non-reduced heterotetramer (95 kDa – Lane 2) protein and the reduced HC (37.5 kDa) and C<sub>L</sub> (12 kDa) proteins (Lane 4). (c) Analytical SEC of the WT pertuzumab IgG1, IgG1(-Fv), and pertuzumab IgG1 Fab with the solution molecular weights measured by static light scattering. (d) DSC analysis of the IgG1(-Fv) protein indicating the stability and cooperativity of folding of the C<sub>H</sub>1/C<sub>L</sub> heterodimeric unit.

```

WT VH      EVQLVESGGGLVQPGGSLRLSCAASGFTFTDYTMDWVRQAPGKGLWVAADVHPNSGGSIYNQRFKGRFTLSVDRSKNTLYLQMNSLRAEDTAVYYC
VRD1 VH      EVQLVESGGGLVQPGGSLRLSCAASGFTFTDYTMDWVRKAPGKGLWVAADVHPNSGGSIYNQRFKGRFTLSVDRSKNTLYLQMNSLRAEDTAVYYC
VRD2 VH      EVQLVESGGGLVQPGGSLRLSCAASGFTFTDYTMDWVRYAPGKGLWVAADVHPNSGGSIYNQRFKGRFTLSVDRSKNTLYLQMNSLRAEDTAVYYC
1
WT VL      DIQMTQSPSSLSASVGDRTYITCKASQDVSIGVAMTQQKPKGKAPKLLIYSASYRYTGVPSRFSGSGSGTDFTLTISSLQPEDFATYYC
VRD1 VL      RIQMTQSPSSLSASVGDRTYITCKASQDVSIGVAMTQDKPKGKAPKLLIYSASYRYTGVPSRFSGSGSGTDFTLTISSLQPEDFATYYC
VRD2 VL      DIQMTQSPSSLSASVGDRTYITCKASQDVSIGVAMTQRKPKGKAPKLLIYSASYRYTGVPSRFSGSGSGTDFTLTISSLQPEDFATYYC
146
WT CH1      ASTKGPVPEPLAPSSKSTSGGTALALGCLVVDYFPEPVTVSMNSGALTSQVHFPAYLQSSGLYSLSVYTVPSLSLGTQTYICNVNHPSENTKVDKRV
CRD1 CH1      ASTKGPVPEPLAPSSKSTSGGTALALGCLVVDYFPEPVTVSMNSGALTSQVHFPAYLQSSGLYSLSVYTVPSLSLGTQTYICNVNHPSENTKVDKRV
CRD2 CH1      ASTKGPVPEPLAPSSKSTSGGTALALGCLVVDYFPEPVTVSMNSGALTSQVHFPAYLQSSGLYSLSVYTVPSLSLGTQTYICNVNHPSENTKVDKRV
172
174
190
WT Cλ      GQPKAAPSVTLFPPSSEELQANKATLVCLISDFYPGAVTVANKADSSEVKAGVETTPPSKQSNPKYAASSYLSTLPEQMKSHRSYSCQVTHEGSTVEKTVAPTEC
CRD1 Cλ      GQPKAAPSVTLFPPSSEELQANKATLVCLISDFYPGAVTVANKADSSEVKAGVETTPPSKQSNPKYAASSYLSTLPEQMKSHRSYSCQVTHEGSTVEKTVAPTEC
CRD2 Cλ      GQPKAAPSVTLFPPSSEELQANKATLVCLISDFYPGAVTVANKADSSEVKAGVETTPPSKQSNPKYAASSYLSTLPEQMKSHRSYSCQVTHEGSTVEKTVAPTEC
129
135
176

```

**Supplementary Figure 2** Sequence alignment of WT, VRD1\_CRD2, and VRD2 Fab HCs and LCs. The designed residues are highlighted in yellow and labeled.

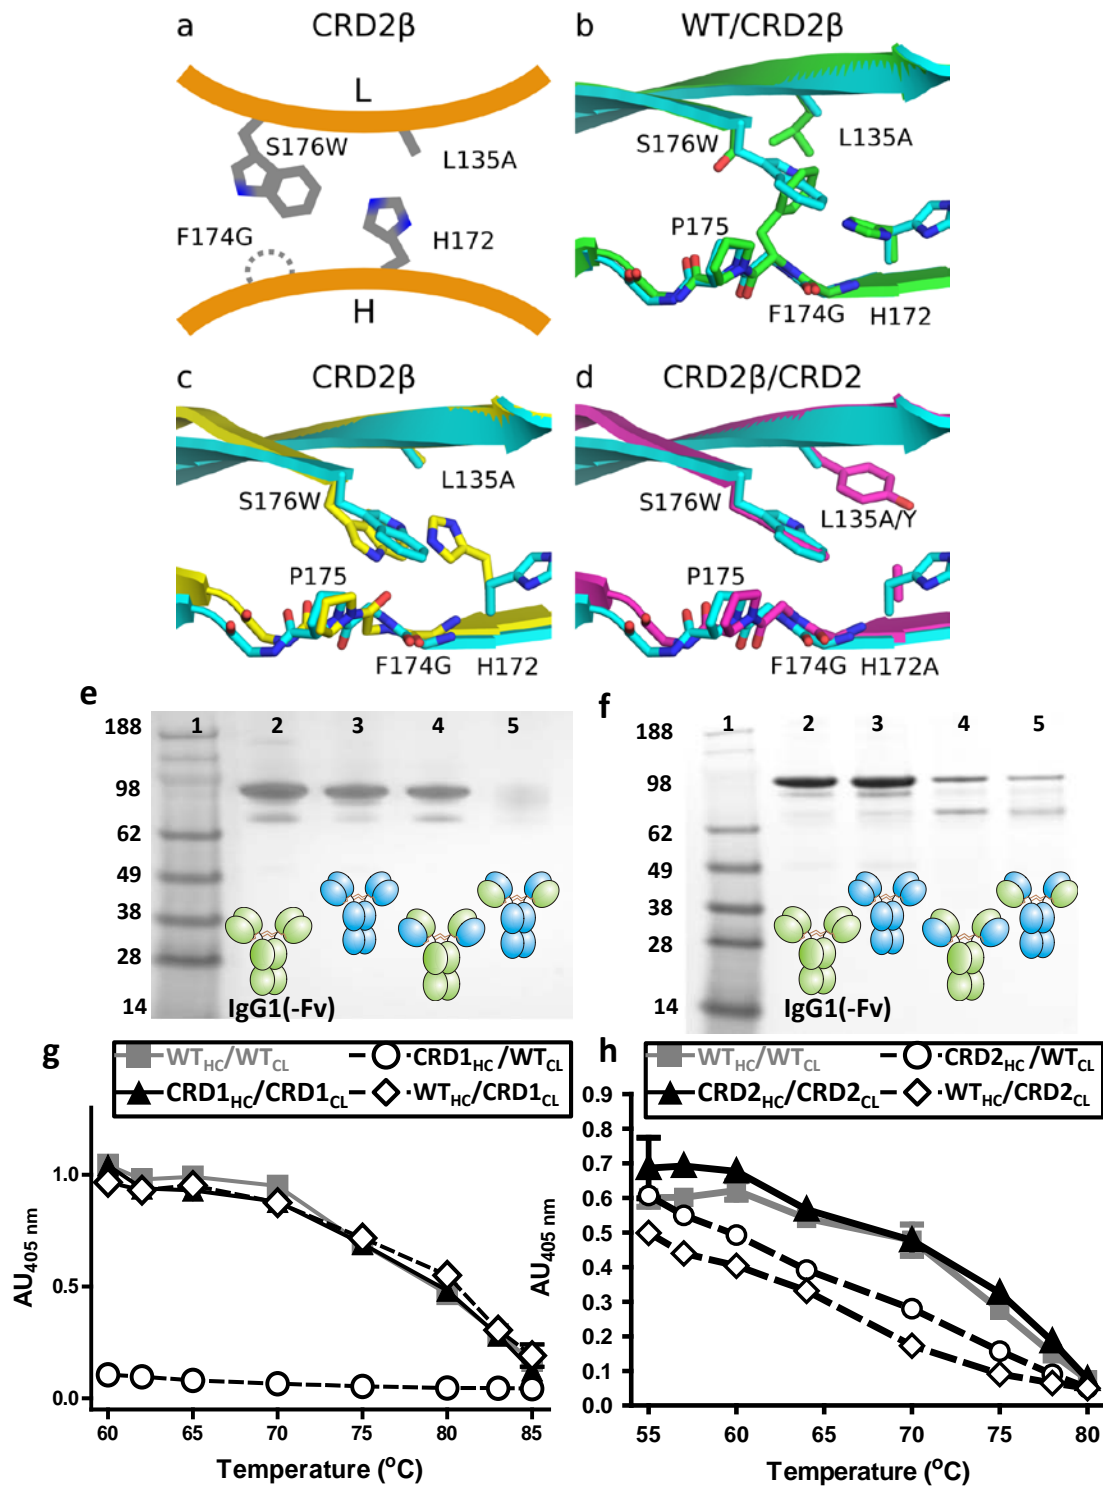

**Supplementary Figure 3** Schematic demonstrating the pre-prolyl trans-cis peptide bond isomerization between C<sub>H1</sub>\_F174G and C<sub>H1</sub>\_P175 present in the crystal structure of design CRD2 $\beta$ . Panel a shows a schematic of CRD2 $\beta$  (compare Figure 2, panels c and d). Panel b shows, in green, a WT C<sub>H1</sub>/C<sub>L</sub> interface (repacked, from 3TV3) and, in blue, the design model for CRD2 $\beta$ . Panel c shows the same design model along with the crystal structure of CRD2 $\beta$  (4LLQ) in yellow. Notice the peptide bond isomerization between C<sub>H1</sub>\_F174G and C<sub>H1</sub>\_P175 and the incorrectly predicted C<sub>L</sub>\_S176W rotamer. Panel d shows the

final crystal structure CRD2 (4LLY) in magenta compared with the CRD2 $\beta$  design model. The mutations added to CRD2 bring the C<sub>L</sub>\_S176W rotamer and C<sub>H1</sub>\_F174G-C<sub>H1</sub>\_P175 backbone back in line with the design model. Notice that Rosetta could not have predicted the backbone isomerization because that bond was not free to isomerize during modeling. (e-g) Additional characterization of the specificity afforded by CRD1 and CRD2 in the IgG1(-Fv) format. SDS-PAGE analysis of WT IgG1(-Fv) (depicted in green, lane 1), IgG1(-Fv) with the CRD1 (e) or CRD2 (f) design in C<sub>H1</sub>/C<sub>L</sub> (depicted in blue, lane 2), and the mismatched pairs (lanes 3-4). Relative stability using a thermal challenge assay of WT IgG1(-Fv) (grey squares), IgG1(-Fv) with CRD1 (g) or CRD2 (h) (black triangles) and mismatched pairs (open circles = CRD HC/WT LC, open diamonds = WT HC/CRD LC). In the thermal challenge assay, the protein samples were heated for 1 h at the specified temperatures, cooled, and assessed for their presence using an anti-Fc/anti-C<sub>L</sub> ELISA.

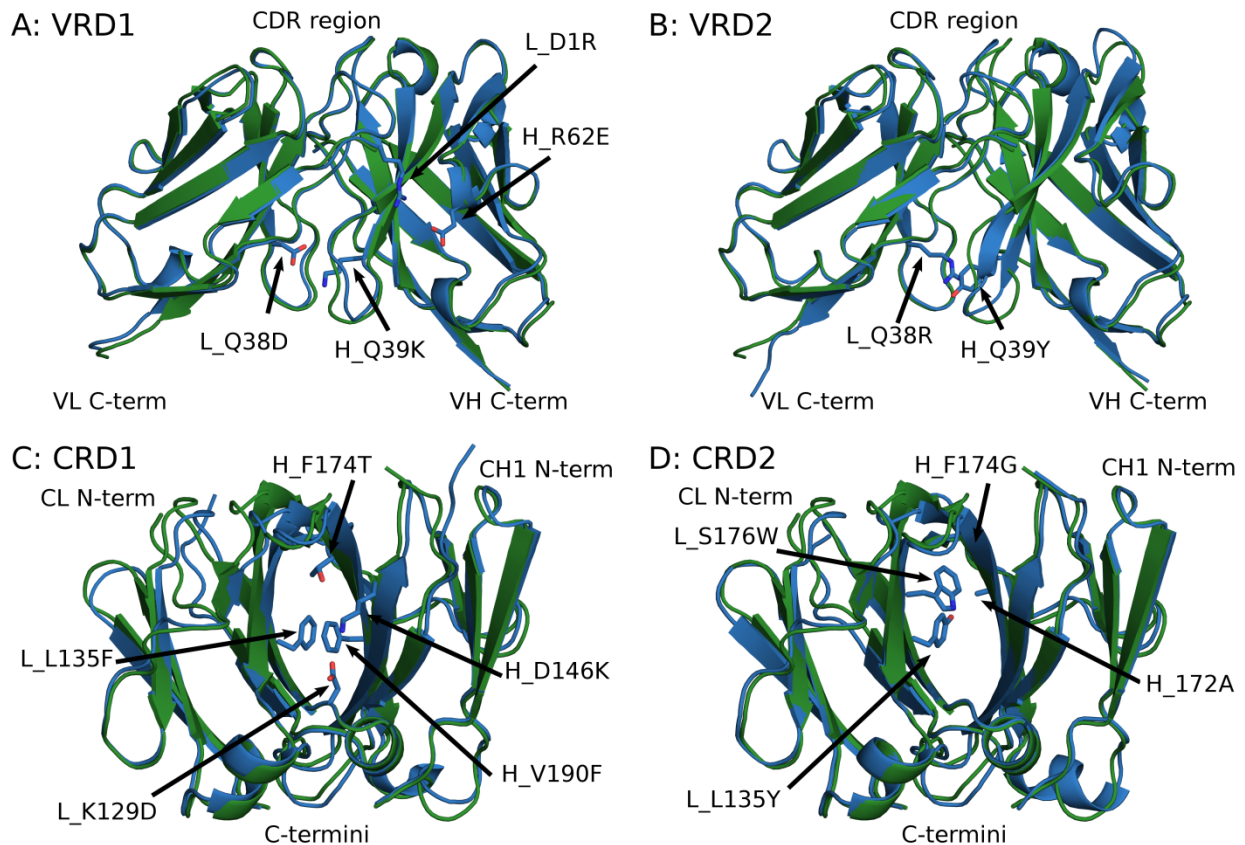

**Supplementary Figure 4** In each panel, our WT Fab structure is in green, and a mutant structure is in blue. Panels A and B are  $V_H/V_L$  dimers (with the CDR loop region at the top), and Panels C and D are the  $C_H1/C_L$  dimer. Mutations are highlighted. In Panel A, we compare the VRD1 mutation in the  $V_H/V_L$  dimer. There is very little global structural change ( $0.37 \text{ \AA}$  RMSD), with a small change to the loop containing the Q39K mutation, which is opposite the CDR region. Panel B shows design VRD2, again with a small change in the loop conformation containing Q39Y, and little global change ( $0.39 \text{ \AA}$  RMSD). Panel C shows design CRD1, with a small  $0.72 \text{ \AA}$  RMSD due to a minor rotation of the rigid body orientation of the two halves of the dimer. Panel D shows design CRD2, with a global RMSD of  $0.67 \text{ \AA}$ . The apparent change in the helix in the lower right corner of Panel D is due to a crystal contact in the CRD2 design crystal (blue). Some of the sidechain atoms were modeled in D1R in VRD1 and D146K in CRD1 due to missing electron density.

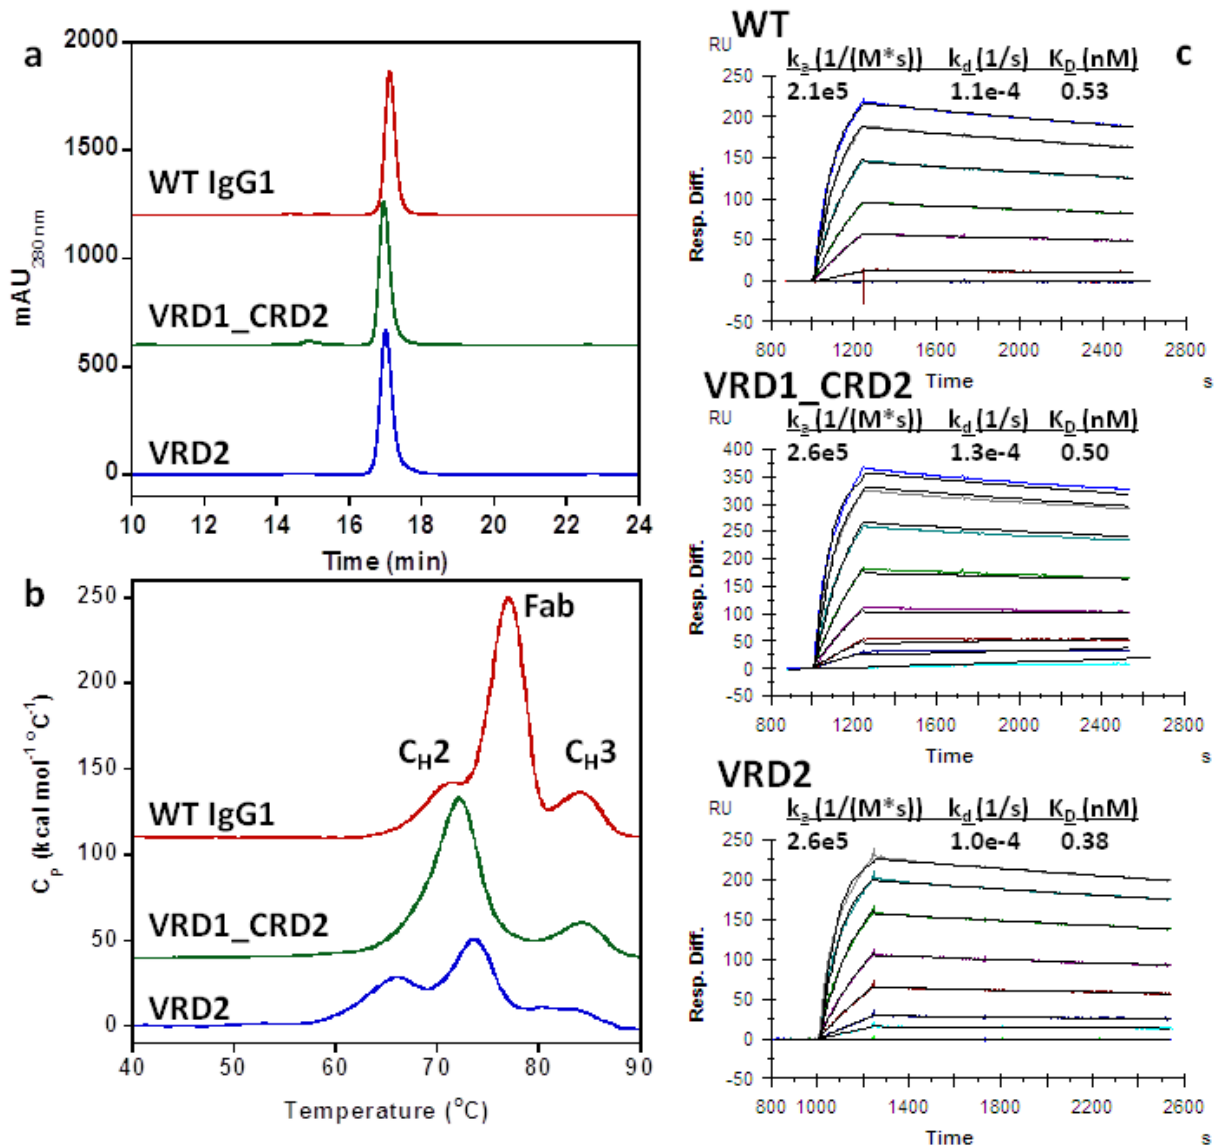

**Supplementary Figure 5** Analytical SEC (a) and DSC (b) of WT pertuzumab IgG1 and pertuzumab variants containing both VRD1 and CRD2 or VRD2. (c) Kinetic biacore analyses of WT (top), VRD2 (middle), and VRD1\_CRD2 (bottom) pertuzumab Fabs binding to immobilized HER-2 antigen. Fab concentrations were 50, 35, 20, 10, 5, 2, 1 nM. Results of fits to a 1:1 kinetic binding model are shown above each experiment. Except for the DSC,  $C\lambda$  was in both LCs.

**Supplemental Figure 6** Sequence alignments of all the HC and LC sequences utilized in the generation of the IgG1 BsAbs described in **Table 1**. The variable domains (including D and J linkers) are highlighted in **yellow**. The constant domains are highlighted in **blue**. Mutations that enable HC/LC specificity are highlighted in **red**. The V<sub>H</sub> and V<sub>K</sub> germline family from which each variable domain is derived is listed next to the wild-type sequences. The constant domain (CLambda or CKappa) that was used in each LC is also listed.

**Pertuzumab\_HC**

Pertuzumab\_WT\_VH3 EVQLVESGGGLVQPGGSLRLSCAASGFTFTDYMHWVRQAPGKGLEWVADVNPNSGGSIY  
 Pertuzumab\_VRD1CRD2 EVQLVESGGGLVQPGGSLRLSCAASGFTFTDYMHWVRQAPGKGLEWVADVNPNSGGSIY  
 Pertuzumab\_VRD2 EVQLVESGGGLVQPGGSLRLSCAASGFTFTDYMHWVRQAPGKGLEWVADVNPNSGGSIY

Pertuzumab\_WT\_VH3 NQRFKGRFTLSVDRSKNTLYLQMNSLRAEDTAVYYCARNLGPSFYFDYWGQGLTVTVSSA  
 Pertuzumab\_VRD1CRD2 NQRFKGRFTLSVDRSKNTLYLQMNSLRAEDTAVYYCARNLGPSFYFDYWGQGLTVTVSSA  
 Pertuzumab\_VRD2 NQRFKGRFTLSVDRSKNTLYLQMNSLRAEDTAVYYCARNLGPSFYFDYWGQGLTVTVSSA

Pertuzumab\_WT\_VH3 STKGPSVFPFLAPSSKSTSGGTAALGCLVKDYFPEPVTVSWNSGALTSVHTFPAVLQSSG  
 Pertuzumab\_VRD1CRD2 STKGPSVFPFLAPSSKSTSGGTAALGCLVKDYFPEPVTVSWNSGALTSVHTFPAVLQSSG  
 Pertuzumab\_VRD2 STKGPSVFPFLAPSSKSTSGGTAALGCLVKDYFPEPVTVSWNSGALTSVHTFPAVLQSSG

Pertuzumab\_WT\_VH3 LYSLSVVTVPPSSSLGTQTYICNVNHKPSNTKVDKKVEPKSC  
 Pertuzumab\_VRD1CRD2 LYSLSVVTVPPSSSLGTQTYICNVNHKPSNTKVDKKVEPKSC  
 Pertuzumab\_VRD2 LYSLSVVTVPPSSSLGTQTYICNVNHKPSNTKVDKKVEPKSC

**Pertuzumab\_LC**

Pertuzumab\_WT\_VK1CLambda DIQMTQSPSSLSASVGRVITITCKASQDVSIGVAWYQKPKGKAPKLLIYS  
 Pertuzumab\_VRD1CRD2 RIQMTQSPSSLSASVGRVITITCKASQDVSIGVAWYQKPKGKAPKLLIYS  
 Pertuzumab\_VRD2\_VK1CKappa DIQMTQSPSSLSASVGRVITITCKASQDVSIGVAWYQKPKGKAPKLLIYS

Pertuzumab\_WT\_VK1CLambda ASRYRGTGVPVSRFSGSGSDFTFLTISSLQPEDFATYYCQYYIYPYTFGQ  
 Pertuzumab\_VRD1CRD2 ASRYRGTGVPVSRFSGSGSDFTFLTISSLQPEDFATYYCQYYIYPYTFGQ  
 Pertuzumab\_VRD2\_VK1CKappa ASRYRGTGVPVSRFSGSGSDFTFLTISSLQPEDFATYYCQYYIYPYTFGQ

Pertuzumab\_WT\_VK1CLambda GTKVEIKGQPKAAPSVTLFPPSSEELQANKATLVCLISDFYPGAVTVAWK  
 Pertuzumab\_VRD1CRD2 GTKVEIKGQPKAAPSVTLFPPSSEELQANKATLVCLISDFYPGAVTVAWK  
 Pertuzumab\_VRD2\_VK1CKappa GTKVEIK-RTVAAPSVFIFPPSDEQLKSGTASVCLLNNFYPREAKVQWK

Pertuzumab\_WT\_VK1CLambda ADSSPVKAG-VETTPSKQSNNKYAASSYLSLTPEQWKSQRSYSCQVTHE  
 Pertuzumab\_VRD1CRD2 ADSSPVKAG-VETTPSKQSNNKYAASSYLSLTPEQWKSQRSYSCQVTHE  
 Pertuzumab\_VRD2\_VK1CKappa VDNALQSGNSQESVTEQDSKSTYLSSTLTLSKADYEKHKVYACEVTHQ

Pertuzumab\_WT\_VK1CLambda G--STVEKTVAPTEC  
 Pertuzumab\_VRD1CRD2 G--STVEKTVAPTEC  
 Pertuzumab\_VRD2\_VK1CKappa GLSSPVTKSFNRGEC

**Matuzumab\_HC**

Matuzumab\_WT\_VH1 QVQLVQSGAEVKKPGASVKVSCKASGYTFTSHWMHWVRQAPGGLEWIGEFNPSNGRTNY  
 Matuzumab\_VRD1CRD2 QVQLVQSGAEVKKPGASVKVSCKASGYTFTSHWMHWVRQAPGGLEWIGEFNPSNGRTNY  
 Matuzumab\_VRD2 QVQLVQSGAEVKKPGASVKVSCKASGYTFTSHWMHWVRQAPGGLEWIGEFNPSNGRTNY

Matuzumab\_WT\_VH1 NEKFKSKATMTVDTSTNTAYMELSSLRSEDVAVYYCASRDYDYGRIYFDYWGQGLTVTVS  
 Matuzumab\_VRD1CRD2 NEKFKSKATMTVDTSTNTAYMELSSLRSEDVAVYYCASRDYDYGRIYFDYWGQGLTVTVS  
 Matuzumab\_VRD2 NEKFKSKATMTVDTSTNTAYMELSSLRSEDVAVYYCASRDYDYGRIYFDYWGQGLTVTVS

Matuzumab\_WT\_VH1 SASTKGPSVFPFLAPSSKSTSGGTAALGCLVKDYFPEPVTVSWNSGALTSVHTFPAVLQSS  
 Matuzumab\_VRD1CRD2 SASTKGPSVFPFLAPSSKSTSGGTAALGCLVKDYFPEPVTVSWNSGALTSVHTFPAVLQSS  
 Matuzumab\_VRD2 SASTKGPSVFPFLAPSSKSTSGGTAALGCLVKDYFPEPVTVSWNSGALTSVHTFPAVLQSS

Matuzumab\_WT\_VH1 SGLYSLSVVTVPPSSSLGTQTYICNVNHKPSNTKVDKKVEPKSC  
 Matuzumab\_VRD1CRD2 SGLYSLSVVTVPPSSSLGTQTYICNVNHKPSNTKVDKKVEPKSC  
 Matuzumab\_VRD2 SGLYSLSVVTVPPSSSLGTQTYICNVNHKPSNTKVDKKVEPKSC

**Matuzumab\_LC**

Matuzumab\_WT\_VK1CLambda DIQMTQSPSSLSASVGDRTITCSASSSVTYMYWYQOKPGKAPKLLIYDT  
Matuzumab\_VRD1CRD2 RIQMTQSPSSLSASVGDRTITCSASSSVTYMYWYQOKPGKAPKLLIYDT  
Matuzumab\_VRD2 DIQMTQSPSSLSASVGDRTITCSASSSVTYMYWYQOKPGKAPKLLIYDT

Matuzumab\_WT\_VK1CLambda SNLASGVPSRFSGSGSDTYFTTISLQPEDFATYYCQQWSSHIFTFGQG  
Matuzumab\_VRD1CRD2 SNLASGVPSRFSGSGSDTYFTTISLQPEDFATYYCQQWSSHIFTFGQG  
Matuzumab\_VRD2 SNLASGVPSRFSGSGSDTYFTTISLQPEDFATYYCQQWSSHIFTFGQG

Matuzumab\_WT\_VK1CLambda TKVEIKGQPKAAPSVTLFPPSSEELQANKATLVCLISDFYPGAVTVAWKA  
Matuzumab\_VRD1CRD2 TKVEIKGQPKAAPSVTLFPPSSEELQANKATLVCLISDFYPGAVTVAWKA  
Matuzumab\_VRD2 TKVEIKGQPKAAPSVTLFPPSSEELQANKATLVCLISDFYPGAVTVAWKA

Matuzumab\_WT\_VK1CLambda DSSPVKAGVETTTSPKQSNKYAASSYLSLTPEQWKSQRSYSCQVTHEGS  
Matuzumab\_VRD1CRD2 DSSPVKAGVETTTSPKQSNKYAASSYLSLTPEQWKSQRSYSCQVTHEGS  
Matuzumab\_VRD2 DSSPVKAGVETTTSPKQSNKYAASSYLSLTPEQWKSQRSYSCQVTHEGS

Matuzumab\_WT\_VK1CLambda TVEKTVAPTEC  
Matuzumab\_VRD1CRD2 TVEKTVAPTEC  
Matuzumab\_VRD2 TVEKTVAPTEC

**METMAb\_HC**

MetMAb\_WT\_VH3 EVQLVESGGGLVQPGGSLRLSCAASGYTFSTSYWLHWVRQAPGKGLEWVGMIDPSNSDTRF  
MetMAb\_VRD1CRD2 EVQLVESGGGLVQPGGSLRLSCAASGYTFSTSYWLHWVRQAPGKGLEWVGMIDPSNSDTRF

MetMAb\_WT\_VH3 NPNFKDRFTISADTSKNTAYLQMNLSRAEDTAVYYCATYRSYVTPLDYWGQGLTVTVSSA  
MetMAb\_VRD1CRD2 NPNFKDRFTISADTSKNTAYLQMNLSRAEDTAVYYCATYRSYVTPLDYWGQGLTVTVSSA

MetMAb\_WT\_VH3 STKGPSVFPFLAPSSKSTSGGTAALGCLVKDYFPEPVTVSWNSGALTSGVHTFPAVLQSSG  
MetMAb\_VRD1CRD2 STKGPSVFPFLAPSSKSTSGGTAALGCLVKDYFPEPVTVSWNSGALTSGVHTFPAVLQSSG

MetMAb\_WT\_VH3 LYSLSVVTVPSSSLGTQTYICNVNHKPSNTKVDKKEPKSC  
MetMAb\_VRD1CRD2 LYSLSVVTVPSSSLGTQTYICNVNHKPSNTKVDKKEPKSC

**METMAb\_LC**

MetMAb\_WT\_VK1CLambda DIQMTQSPSSLSASVGDRTITCKSSQSLLYTSSQKNYLAWYQOKPGKAPKLLIYWASTR  
MetMAb\_VRD1CRD2 RIQMTQSPSSLSASVGDRTITCKSSQSLLYTSSQKNYLAWYQOKPGKAPKLLIYWASTR

MetMAb\_WT\_VK1CLambda ESGVPSRFSGSGSDTFTLTISLQPEDFATYYCQQYYAIPWTFGQGTKEIKGQPKAAP  
MetMAb\_VRD1CRD2 ESGVPSRFSGSGSDTFTLTISLQPEDFATYYCQQYYAIPWTFGQGTKEIKGQPKAAP

MetMAb\_WT\_VK1CLambda SVTLFPPSSEELQANKATLVCLISDFYPGAVTVAWKADSSPVKAGVETTTSPKQSNKYA  
MetMAb\_VRD1CRD2 SVTLFPPSSEELQANKATLVCLISDFYPGAVTVAWKADSSPVKAGVETTTSPKQSNKYA

MetMAb\_WT\_VK1CLambda ASSYLSLTPEQWKSQRSYSCQVTHEGSTVEKTVAPTEC  
MetMAb\_VRD1CRD2 ASSYLSLTPEQWKSQRSYSCQVTHEGSTVEKTVAPTEC

**Anti-Ax1\_HC**

Anti\_Ax1\_WT\_VH3 EVQLVESGGGLVQPGGSLRLSCAASGFSLSGSWIHWRQAPGKGLEWVGMIDPSNYGYY  
Anti\_Ax1\_VRD2 EVQLVESGGGLVQPGGSLRLSCAASGFSLSGSWIHWRQAPGKGLEWVGMIDPSNYGYY

Anti\_Ax1\_WT\_VH3 ADSVKGRFTISADTSKNTAYLQMNLSRAEDTAVYYCAREYSGWGGSSVGYAMDYWGQGLT  
Anti\_Ax1\_VRD2 ADSVKGRFTISADTSKNTAYLQMNLSRAEDTAVYYCAREYSGWGGSSVGYAMDYWGQGLT

Anti\_Ax1\_WT\_VH3 VTVSSASTKGPSVFPFLAPSSKSTSGGTAALGCLVKDYFPEPVTVSWNSGALTSGVHTFPA  
Anti\_Ax1\_VRD2 VTVSSASTKGPSVFPFLAPSSKSTSGGTAALGCLVKDYFPEPVTVSWNSGALTSGVHTFPA

Anti\_Ax1\_WT\_VH3 VLQSSGLYLSVVTVPSSSLGTQTYICNVNHKPSNTKVDKKEPKSC  
Anti\_Ax1\_VRD2 VLQSSGLYLSVVTVPSSSLGTQTYICNVNHKPSNTKVDKKEPKSC

**Anti-Ax1\_LC**

Anti\_Ax1\_WT\_VK1CLambda DIQMTQSPSSLSASVGDRTITCRASQDVSTAVAWYQOKPGKAPKLLIYS



Anti\_Axl\_VRD2 DIQMTQSPSSLSASVGDVRTITCRASQDVSTAVAWYQ**R**KPGKAPKLLIYS

Anti\_Axl\_WT\_VK1CLambda ASFLYSGVPSRFRSGSGSGTDFTLTISSLQPEDFATYYCQQSYTTPPTFGQ  
Anti\_Axl\_VRD2 ASFLYSGVPSRFRSGSGSGTDFTLTISSLQPEDFATYYCQQSYTTPPTFGQ

Anti\_Axl\_WT\_VK1CLambda GTKVEIK**G**QPKAAPSVTLFPPSSEELQANKATLVCLISDFYPGAVTVAWK  
Anti\_Axl\_VRD2 GTKVEIK**G**QPKAAPSVTLFPPSSEELQANKATLVCLISDFYPGAVTVAWK

Anti\_Axl\_WT\_VK1CLambda ADSSPVKAGVETTTPSKQSNKYAASSYLSLTPEQWKSQRSYSCQVTHEG  
Anti\_Axl\_VRD2 ADSSPVKAGVETTTPSKQSNKYAASSYLSLTPEQWKSQRSYSCQVTHEG

Anti\_Axl\_WT\_VK1CLambda STVEKTVAPTEC  
Anti\_Axl\_VRD2 STVEKTVAPTEC

**BHA10\_HC**

BHA10\_WT\_VH1 QVQLVQSGAEVKKPGSSVKVSCKASGYFTFTYYLHWVRQAPGQGLEWMGWIYPGNVHAQY  
BHA10\_VRD2 QVQLVQSGAEVKKPGSSVKVSCKASGYFTFTYYLHWVR**R**APGQGLEWMGWIYPGNVHAQY

BHA10\_WT\_VH1 NEKFKGRVTITADKSTSTAYMELSSLRSEDTAVYYCARSWEGFPYWGQGTITVTVSS**ASTK**  
BHA10\_VRD2 NEKFKGRVTITADKSTSTAYMELSSLRSEDTAVYYCARSWEGFPYWGQGTITVTVSS**ASTK**

BHA10\_WT\_VH1 GPSVFLAPSSKSTSGGTAALGCLVKDYFPEPVTVSWNSGALTSVHTFPAVLQSSGLYS  
BHA10\_VRD2 GPSVFLAPSSKSTSGGTAALGCLVKDYFPEPVTVSWNSGALTSVHTFPAVLQSSGLYS

BHA10\_WT\_VH1 LSSVVTVPSSSLGTQTYICNVNHKPSNTKVDKKEPKSC  
BHA10\_VRD2 LSSVVTVPSSSLGTQTYICNVNHKPSNTKVDKKEPKSC

**BHA10\_IC**

BHA10\_WT\_VK1CKappa DIQMTQSPSSLSASVGDVRTITCKASQNVGINVAWYQ**R**KPGKAPKSLISSASYRYSQVPS  
BHA10\_VRD2 DIQMTQSPSSLSASVGDVRTITCKASQNVGINVAWYQ**R**KPGKAPKSLISSASYRYSQVPS

BHA10\_WT\_VK1CKappa RFRSGSGSGTDFTLTISSLQPEDFATYFCQQYDTPFTFGQGTKVEIKRTVAAPSVFIFPP  
BHA10\_VRD2 RFRSGSGSGTDFTLTISSLQPEDFATYFCQQYDTPFTFGQGTKVEIKRTVAAPSVFIFPP

BHA10\_WT\_VK1CKappa SDEQLKSGTASVVCLLNIFYPREAKVQWKVDNALQSGNSQESVTEQDSKSTYLSSTLT  
BHA10\_VRD2 SDEQLKSGTASVVCLLNIFYPREAKVQWKVDNALQSGNSQESVTEQDSKSTYLSSTLT

BHA10\_WT\_VK1CKappa LSKADYEKHKVYACEVTHQGLSSPVTKSFNRGEC  
BHA10\_VRD2 LSKADYEKHKVYACEVTHQGLSSPVTKSFNRGEC

**Trastuzumab\_HC**

Trastuzumab\_WT\_VH3 EVQLVESGGGLVQPGGSLRLSCAASGFNIKDTYIHWVRQAPGKGLEWVARIYPTNGYTRY  
Trastuzumab\_VRD1CRD2 EVQLVESGGGLVQPGGSLRLSCAASGFNIKDTYIHWVR**R**APGKGLEWVARIYPTNGYTRY

Trastuzumab\_WT\_VH3 ADSVKGRFTISADTSKNTAYLQMNLSRAEDTAVYYCSRWGGDGFYAMDYWGQGLTVTVSS  
Trastuzumab\_VRD1CRD2 AD**E**VKGRFTISADTSKNTAYLQMNLSRAEDTAVYYCSRWGGDGFYAMDYWGQGLTVTVSS

Trastuzumab\_WT\_VH3 ASTKGPSVFPLAPSSKSTSGGTAALGCLVKDYFPEPVTVSWNSGALTSVHTFPAVLQSS  
Trastuzumab\_VRD1CRD2 ASTKGPSVFPLAPSSKSTSGGTAALGCLVKDYFPEPVTVSWNSGALTSVHT**F**PAVLQSS

Trastuzumab\_WT\_VH3 GLYSLSSVVTVPSSSLGTQTYICNVNHKPSNTKVDKKEPKSC  
Trastuzumab\_VRD1CRD2 GLYSLSSVVTVPSSSLGTQTYICNVNHKPSNTKVDKKEPKSC

**Trastuzumab\_IC**

Trastuzumab\_WT\_VK1CKappa DIQMTQSPSSLSASVGDVRTITCRASQDVNTAVAWYQ**R**KPGKAPKLLIYS  
Trastuzumab\_VRD1CRD2 **R**IQMTQSPSSLSASVGDVRTITCRASQDVNTAVAW**Q****R**KPGKAPKLLIYS

Trastuzumab\_WT\_VK1CKappa ASFLYSGVPSRFRSGSRSGTDFTLTISSLQPEDFATYYCQQHYTTPPTFGQ  
Trastuzumab\_VRD1CRD2 ASFLYSGVPSRFRSGSRSGTDFTLTISSLQPEDFATYYCQQHYTTPPTFGQ

|                          |                                                    |
|--------------------------|----------------------------------------------------|
| Trastuzumab_WT_VK1CKappa | GTKVEIKRTVAAPSVFIFPPSDEQLKSGTASVVCLLNMFYPREAKVQWKV |
| Trastuzumab_VRD1CRD2     | GTKVEIKRTVAAPSVFIFPPSDEQLKSGTASVVCYLNMFYPREAKVQWKV |
| Trastuzumab_WT_VK1CKappa | DNALQSGNSQESVTEQDSKDYSLSSLTLSKADYEKHKVYACEVTHQG    |
| Trastuzumab_VRD1CRD2     | DNALQSGNSQESVTEQDSKDYSLRSTLTLSKADYEKHKVYACEVTHQG   |
| Trastuzumab_WT_VK1CKappa | LSSPVTKSFNRGEC                                     |
| Trastuzumab_VRD1CRD2     | LSSPVTKSFNRGEC                                     |

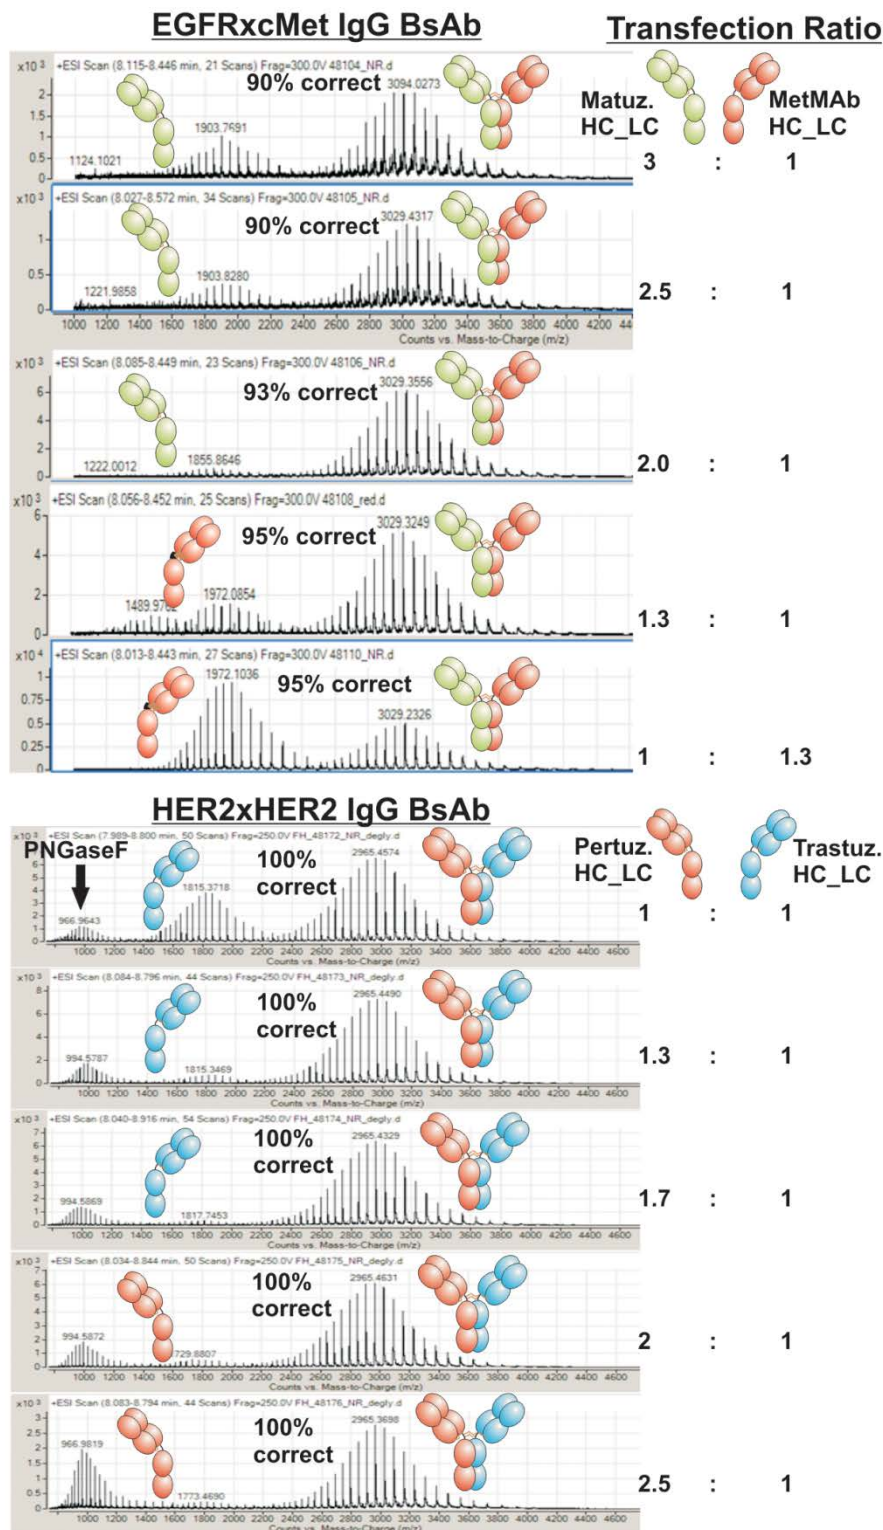

**Supplemental Figure 7**  
 Non-deconvoluted mass spectra of two IgG BsAbs, EGFRxcMET (top half) and (HER2<sup>P</sup>xHER2<sup>T</sup>) (bottom half), expressed while varying transfection ratios of the HC\_LC pairs within each BsAb. The transfections were performed in HEK293F cells using four separate expression plasmids, one expressing each HC and LC within the BsAb. The HC:LC ratio of each half of the IgG BsAb was maintained at a constant 1:2 transfection ratio. Only the ratio of each HC\_LC pair was varied. Overexpression of either half of the IgG BsAb led to the accumulation of “Half-Antibody” (a HC\_LC pair without a disulfide bonded partner) that was visible at a lower molecular weight in the Mass Spectra as well as in SDS-PAGE analyses. Transfection ratios could be found for minimizing the level of Half-Antibody for all the BsAbs that were tested.

The level of correctly assembled IgG BsAb is shown to the left of each IgG BsAb mass envelopes. Interestingly, varying the transfection ratios the HC\_LC pairs did not impact significantly the level of correctly assembled IgG BsAb.

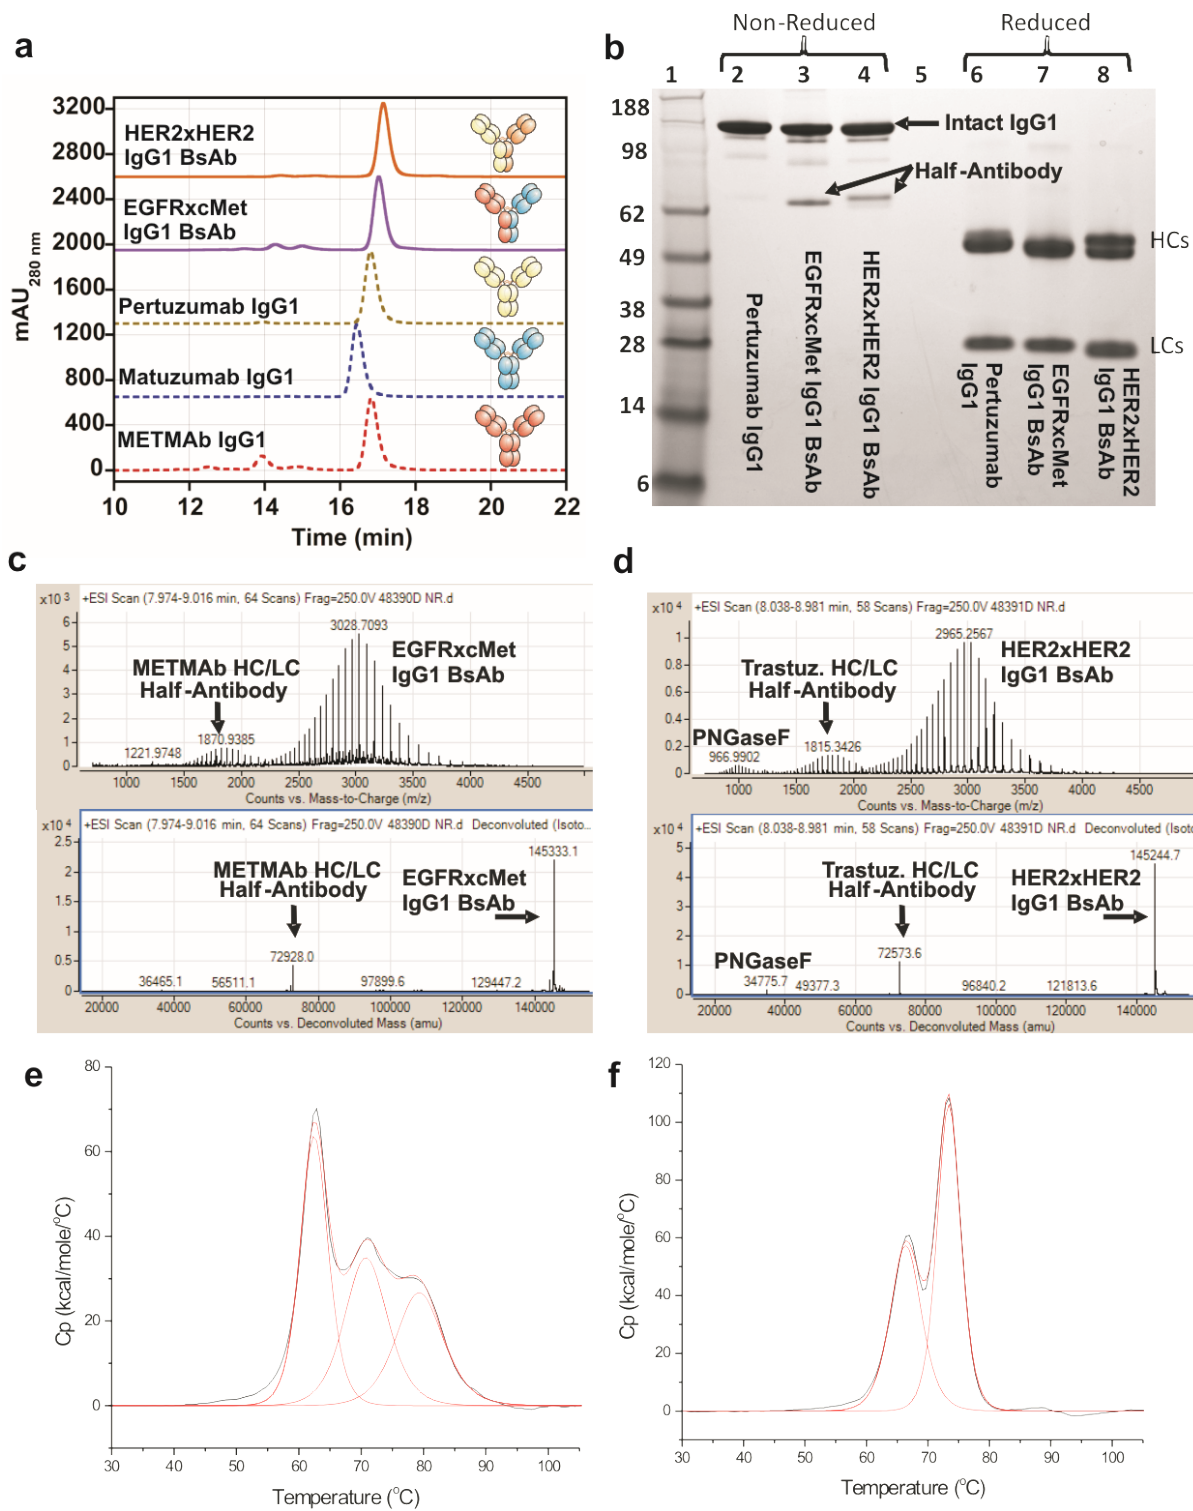

**Supplementary Figure 8** Characterization of the EGFRxcMet and HER2<sup>P</sup>xHER2<sup>T</sup> IgG BsAbs from 1 L cultures. Five days after transient transfection in HEK293F cells with the BsAbs, the cells were spun down and filtered. BsAbs proteins in the cell supernatants were captured onto a MAbSelect (protein A, GE Healthcare) affinity column using an AKTA Explorer FPLC, washed

extensively, and eluted using 0.1 M glycine pH 3.0. The proteins were neutralized using 1 M TrisHCl, pH 8.5 and dialyzed exhaustively against PBS. Panel (a) represents analytical SEC traces of parental monovalent IgG1 MAbs and the EGFR $\times$ cMet and HER2<sup>P</sup> $\times$ HER2<sup>T</sup> IgG1 BsAbs. The data indicates that both BsAbs produced at the 1 L scale are predominately monomeric similar to the parental MAbs. The two BsAbs were concentrated to 20 or 30 mg/mL, respectively, with no significant increases in aggregation or loss of protein using VIVASPIN500, 10 K MWCO filtration devices (Sartorius). Panel (b) shows SDS-PAGE analysis of the IgG BsAbs under non-reducing and reducing (1 mM DTT) conditions. For the analysis, proteins (3-5  $\mu$ g each) were run onto a NuPAGE 4-12% Bis-Tris gel with MES running buffer (Life Technologies) according to manufacturer protocols. Panels (c) and (d) are the raw (top) and deconvoluted (bottom) mass spectra of the EGFR $\times$ cMet and HER2<sup>P</sup> $\times$ HER2<sup>T</sup> IgG1 BsAbs. Proteins were analyzed as described in the methods. The integrated area of the 'Half-Antibody' was 8% and 11%, respectively, for each sample. The average level of correct IgG BsAb assembly (i.e., correct HC/LC pairings) is provided in **Table 1**. Panels (e) and (f) are DSC thermograms of the EGFR $\times$ cMet and HER2<sup>P</sup> $\times$ HER2<sup>T</sup> IgG1 BsAbs, respectively. For the EGFR $\times$ cMet BsAb (pairing Matuzumab and MetMAb), combining V $\kappa$ 1 domains with C $\lambda$  domains resulted in reduced stability of the Fab peak ( $T_m$ ~62 °C). The HER2<sup>P</sup> $\times$ HER2<sup>T</sup> BsAb (Pertuzumab and Trastuzumab) was produced using fully kappa LCs.

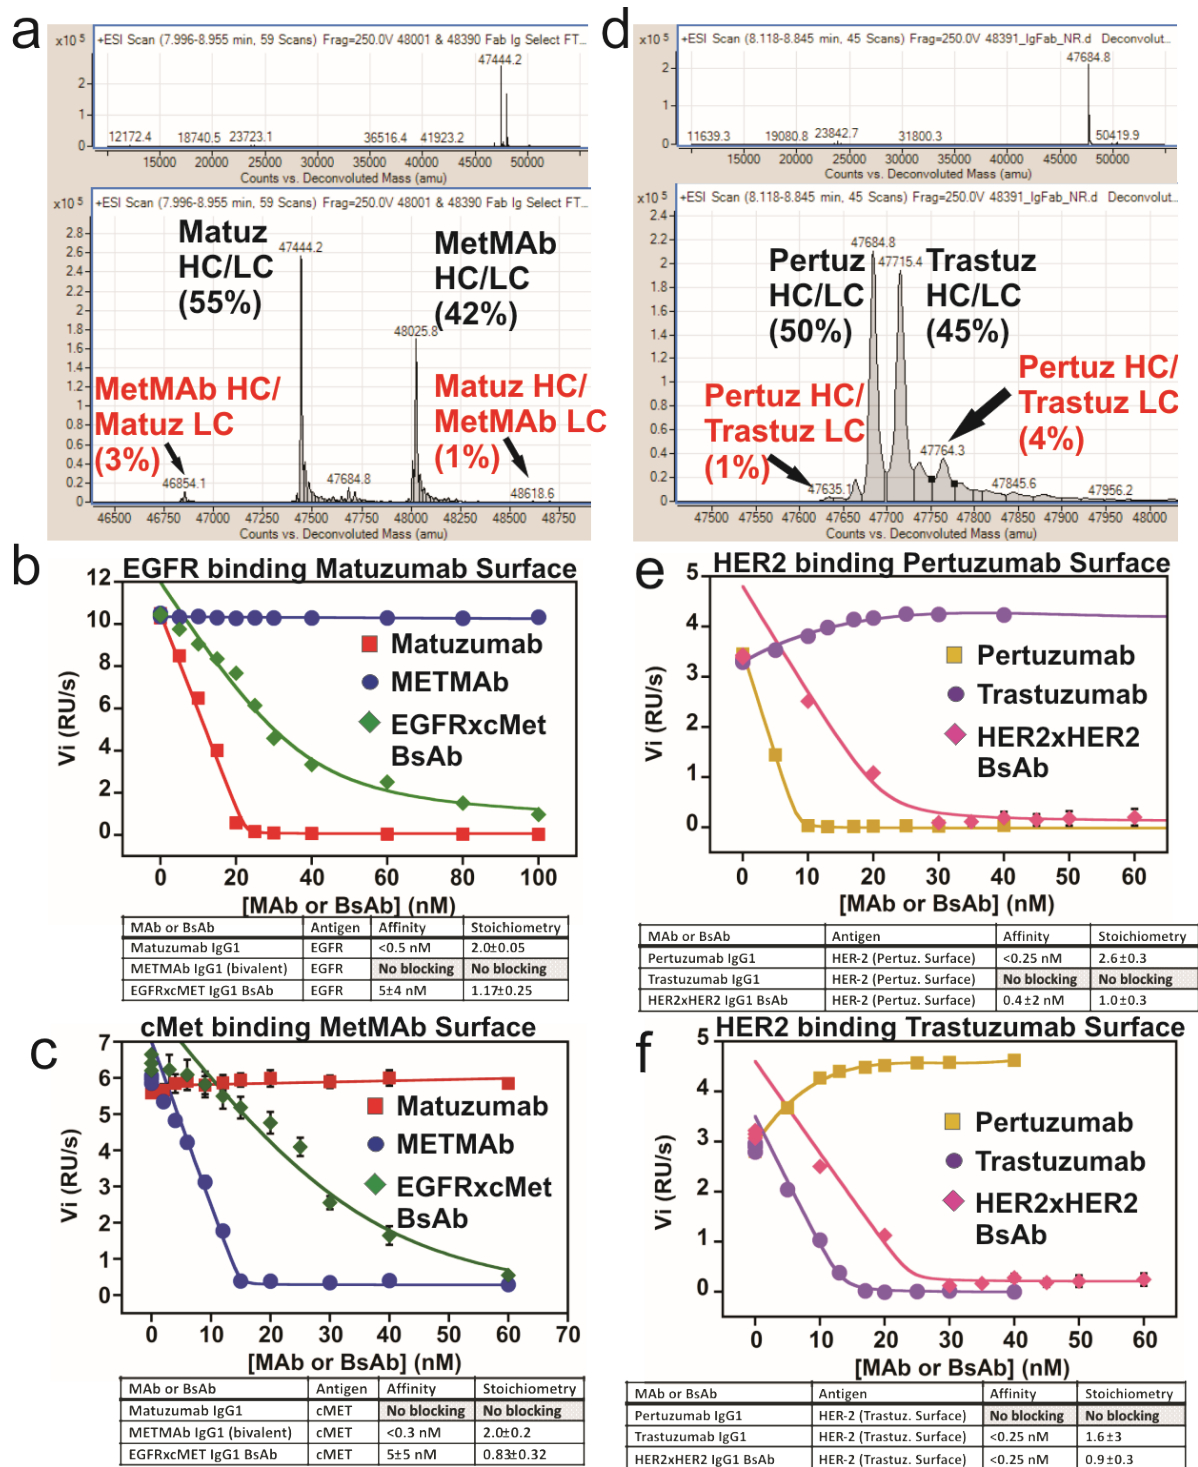

**Supplementary Figure 9** Further characterization of the assembly of the EGFRxcMet (*a-c*) and HER2<sup>P</sup>×HER2<sup>T</sup> (*d-f*) IgG1 BsAbs. Panels (*a*) and (*d*) are deconvoluted mass spectra of the Fabs liberated from the EGFRxcMet and HER2<sup>P</sup>×HER2<sup>T</sup> IgG1 BsAbs, respectively, by papain digestion. For the digestions, 5 mg of each BsAb was dialyzed into 100 mM Tris, 2 mM EDTA pH 7.0 (no salt) and 20 mg papain (Roche cat#10814) was added. The reaction was allowed to

continue for 1.5 hrs at room temperature with gentle rotary mixing. The reaction solution was then passed over an IgSelect column (GE Healthcare) that selectively binds only the Fc fragment. The papain liberated Fabs were passed through the column and were collected, while undigested and Fc-containing material bound the solid support. The collected solutions were immediately analyzed by mass spectrometry as described in the methods. Papain selectively cuts the hinge region of IgG1 MAbs (and BsAbs) between the His and Thr residues (...CDKTH\_cut\_TCPPC...) enabling theoretical mass calculation of both correctly and incorrectly assembled HC/LC pairs. The top panels are the entire deconvoluted spectra (10-55 kDa) while the bottom panels are the regions of interest for determining Fab assembly. Panels (b), (c), (e), and (f) show solution-based antibody-antigen binding studies using surface plasmon resonance for detection. The method is described in (Day et al., 2005 *Biochemistry* 44, 1919-31). The MAbs and BsAbs are titrated into a solution with constant antigen. All antigens were purchased as Fc-fusion proteins from R&D systems. EGFR-Fc was 30 nM; cMet-Fc was 45 nM; and HER2-Fc was 20 nM. The titrated solutions were passed over sensorchip surfaces containing high levels of each parental MAb. The initial slope ( $V_i$ ) of antigen association is linearly dependent on the concentration of antigen and can be utilized to determine  $[\text{antigen}]_{\text{free}}$ . The data obtained is sensitive to both binding affinity and stoichiometry. Results of fitting the data for the affinity and the number of binding arms of each MAb or BsAb are shown in the table below each set of curves. The affinity of some of the molecules was too strong to be measured accurately; however, the X-intercept could be used to determine stoichiometry in all cases. The MAbs demonstrated bivalency toward their respective antigens, while the BsAbs demonstrated monovalency.

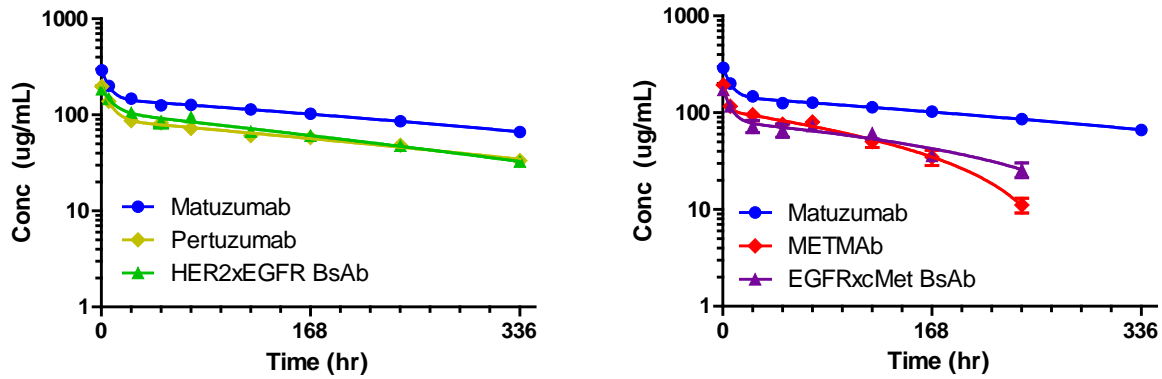

**Supplemental Figure 10** In vivo pharmacokinetic analysis of the HER2×EGFR and EGFR×cMet IgG BsAbs in Balb/c mice. Plotted values represent mean  $\pm$  standard error (n= 3 or 4); error bars are plotted for all data points.

| mAb or BsAb       | Elimination half-life<br>$t_{1/2} \beta$ (hr) | AUC<br>(hr*ug/mL)  | Clearance<br>(mL/hr) | V <sub>ss</sub><br>(mL) |
|-------------------|-----------------------------------------------|--------------------|----------------------|-------------------------|
| Pertuzumab        | 241.6 $\pm$ 15.5                              | 32,374 $\pm$ 1,315 | 0.007 $\pm$ 0.0003   | 2.36 $\pm$ 0.07         |
| Matuzumab         | 294.8 $\pm$ 15.3                              | 64,215 $\pm$ 2,315 | 0.0035 $\pm$ 0.0001  | 1.47 $\pm$ 0.03         |
| MetMab            | 82.5*                                         | 15,977*            | 0.014*               | 1.72*                   |
| HER2×EGFR<br>BsAb | 197.3 $\pm$ 15.2                              | 31,429 $\pm$ 1,390 | 0.007 $\pm$ 0.0003   | 1.99 $\pm$ 0.09         |
| cMet×EGFR<br>BsAb | 137.6 $\pm$ 21.2                              | 18,224 $\pm$ 1,613 | 0.012 $\pm$ 0.001    | 2.39 $\pm$ 0.23         |

Pharmacokinetic parameters are shown for MAbs and BsAbs. Data fitted to the IV bolus model represent estimated mean  $\pm$  standard error. \*Data fitted by non-compartmental analysis represent estimated mean.



**Supplementary Protocol 1. PREPACK.** This is a Rosetta3 command line which will perform the repacking rotamer relaxation used in this work. This is expected to take a few minutes on a single processor.

Command line:

```
/path/to/rosetta/source/bin/fixbb.<os><mode>release @options
```

The options file consists of:

```
#begin options
#database path
-database /path/to/rosetta/database
#input path
-s input.pdb
#use extra rotamers
-ex1
-ex2
-ex_cutoff 0
#use the crystal rotamer if it is superior
-use_input_sc
#do not design
-packing:repack_only
#perform 10 repacks but only output the best
-ndruns 10
#end options
```

**Supplementary Protocol 2. Multistate design script.** Specifications necessary to run heterodimer-to-orthogonal-heterodimer multistate design calculations via Rosetta's mpi\_msd application. This example is drawn from the experiment used to create design CRD1<sup>2</sup>. Extensive reference to Rosetta's mpi\_msd documentation and examples published with the code is strongly suggested. Use in MPI is strongly suggested. The number of processors should be an even divisor of (preferably equal to) the number of states (10 in this example).

Command line:

```
/path/to/rosetta/source/bin/mpi_msd.<os><mode>release @options
```

The options file consists of:

```
#begin options
```

```
#mpi_msd options - refer to its documentation
```

```
-entity_resfile entity.resfile
```

```
-fitness_file fitness.daf
```

```
-ms::pop_size 100
```

```
-ms::generations 240
```

```
-ms::numresults 10
```

```
-use_input_sc
```

```
-ms::fraction_by_recombination 0.025
```

```
#-msd::double_lazy_ig_mem_limit 800
```

```
-database /path/to/rosetta/database
```

```
#write the rosetta version and options to the log file
```

```
-options:user
```

```
-run:version
```

```
#write each processor to its own file, for organization
```

```
-mpi_tracer_to_file proc
```

```
#this exclusion reduces memory use but is not important
```

```
-chemical:exclude_patches LowerDNA UpperDNA Cterm_amidation SpecialRotamer  
protein_cutpoint_upper protein_cutpoint_lower VirtualBB ShoveBB
```

```
VirtualDNAPhosphate VirtualNTerm CTermConnect sc_orbitals
```

```
pro_hydroxylated_case1 pro_hydroxylated_case2 ser_phosphorylated
```

```
thr_phosphorylated tyr_phosphorylated tyr_sulfated lys_dimethylated
```

```
lys_monomethylated lys_trimethylated lys_acetylated glu_carboxylated
```

```
cys_acetylated tyr_diiodinated N_acetylated C_methylamidated
```

```
MethylatedProteinCterm
```

```
#scorefunction corrections, notice these have been superseded in the time  
before publication
```

```
-corrections::score::scorel2prime
```

```
-no_his_his_pairE
```

```
#end options
```

File fitness.daf. This is the main setup file for mpi\_msd. The nomenclature "LpHp", with p for "prime", means light chain and heavy chain mutant. Lack of prime means the wild type sequence - the undesired mixed products.

```
#begin fitness.daf
```

```

#Light chain, mutant, by itself
STATE_VECTOR Lp Lp.states
#Heavy chain, mutant, by itself
STATE_VECTOR Hp Hp.states
#mutant pair
STATE_VECTOR LpHp LpHp.states
#cross pair
STATE_VECTOR LHp LHp.states
#cross pair
STATE_VECTOR LpH LpH.states

#constant states do not need to be modeled
POSE_ENERGY bestL 3TV3_CL.pdb
POSE_ENERGY bestH 3TV3_CH1.pdb
POSE_ENERGY bestLH 3TV3_CH1CL.pdb

# extract the lowest-energy from each vector of state energies
SCALAR_EXPRESSION bestLp = vmin( Lp )
SCALAR_EXPRESSION bestHp = vmin( Hp )
SCALAR_EXPRESSION bestLpHp = vmin( LpHp )
SCALAR_EXPRESSION bestLHp = vmin( LHp )
SCALAR_EXPRESSION bestLpH = vmin( LpH )

# now compute the binding energies
SCALAR_EXPRESSION dGbind_LpHp = bestLpHp - bestLp - bestHp
SCALAR_EXPRESSION dGbind_LHp = bestLHp - bestL - bestHp
SCALAR_EXPRESSION dGbind_LpH = bestLpH - bestLp - bestH
SCALAR_EXPRESSION dGbind_LH = bestLH - bestL - bestH

#-12 is the energy cap, determined empirically as the rough value of redocked
binding energy for the worst mutations
SCALAR_EXPRESSION clipped_dGbindLHp = ite( lt( dGbind_LHp, -12.0 ),
dGbind_LHp, ( -12.0 + 0 * dGbind_LHp ) )
SCALAR_EXPRESSION clipped_dGbindLpH = ite( lt( dGbind_LpH, -12.0 ),
dGbind_LpH, ( -12.0 + 0 * dGbind_LpH ) )

#this file counts the number of mutations and penalizes for too many
ENTITY_FUNCTION cstE 3TV3.entfunc

#this is the final fitness function
FITNESS 1.0 * bestLpHp - 0 * dGbind_LpHp + 0.5 * ( clipped_dGbindLpH +
clipped_dGbindLHp ) + 1.0 * cstE
#end fitness.daf

File 3TV3.entfunc. This file, referenced in fitness.daf, controls for the
number of mutations.
#begin 3TV3.entfunc
#ee_1 is L-L135
SET_CONDITION eelnat = ee_1 in { L }

#ee_2 is L-S165
SET_CONDITION ee2nat = ee_2 in { S }

#ee_3 is L-A174
SET_CONDITION ee3nat = ee_3 in { A }

#ee_4 is L-S176

```

```

SET_CONDITION ee4nat = ee_4 in { S }

#ee_5 is H-H172
SET_CONDITION ee5nat = ee_5 in { H }

#ee_6 is H-F174
SET_CONDITION ee6nat = ee_6 in { F }

#ee_7 is H-P175
SET_CONDITION ee7nat = ee_7 in { P }

#ee_8 is H-S188
SET_CONDITION ee8nat = ee_8 in { S }

#ee_9 is H-V190
SET_CONDITION ee9nat = ee_9 in { V }

```

```

#count the number of mutations
SUB_EXPRESSION nnat_L = 0 + ee5nat + ee6nat + ee7nat + ee8nat + ee9nat
SUB_EXPRESSION nnat_H = 0 + ee1nat + ee2nat + ee3nat + ee4nat

```

```

#penalize after 3 mutations per chain;
SUB_EXPRESSION mut_H_penalty = ite( lt( nnat_H, 2 ), 2 - nnat_H, 0 )
SUB_EXPRESSION mut_L_penalty = ite( lt( nnat_L, 1 ), 1 - nnat_L, 0 )

```

```

SCORE 3 * ( mut_H_penalty + mut_L_penalty )
#end 3TV3.entfunc

```

The states files, specified in fitness.daf, correlate what states exist, which input PDB files provide the backbone for each state, and how to correlate the mutable positions onto each backbone. Each file contains two clones of the same setup, to ensure that rare failures of simulated annealing do not poison the results. These input PDBs are not provided.

```

#begin Hp.states
3TV3_CH1.pdb Hp.corr Hx.2resfile
3TV3_CH1.pdb Hp.corr Hx.2resfile
#end Hp.states

#begin LHp.states
3TV3_CH1CL.pdb LHp.corr LxHx.2resfile
3TV3_CH1CL.pdb LHp.corr LxHx.2resfile
#end LHp.states

#begin LpHp.states
3TV3_CH1CL.pdb LpHp.corr LxHx.2resfile
3TV3_CH1CL.pdb LpHp.corr LxHx.2resfile
#end LpHp.states

#begin LpH.states
3TV3_CH1CL.pdb LpH.corr LxHx.2resfile
3TV3_CH1CL.pdb LpH.corr LxHx.2resfile
#end LpH.states

#begin Lp.states
3TV3_CL.pdb Lp.corr Lx.2resfile

```

```
3TV3_CL.pdb Lp.corr Lx.2resfile
#end Lp.states
```

The corr (correspondence) files determine which positions on the backbone map to the mutable positions defined in entity.resfile. Wild-type positions in the mixed wild-type/mutant and mutant/wild-type structures are unrepresented in these files - that is why they do not mutate.

```
#begin Hp.corr
5 172 H
6 174 H
7 175 H
8 188 H
9 190 H
#end Hp.corr
```

```
#begin LHp.corr
5 172 H
6 174 H
7 175 H
8 188 H
9 190 H
#end LHp.corr
```

```
#begin Lp.corr
1 135 L
2 165 L
3 174 L
4 176 L
#end Lp.corr
```

```
#begin LpH.corr
1 135 L
2 165 L
3 174 L
4 176 L
#end LpH.corr
```

```
#begin LpHp.corr
1 135 L
2 165 L
3 174 L
4 176 L
5 172 H
6 174 H
7 175 H
8 188 H
9 190 H
#end LpHp.corr
```

File LxHx.2resfile is a Rosetta resfile that represents a listing of all repackable positions in the desired interface. It contains extra packing instructions encoded in the resfile; these could equivalently be encoded in the options file. Files Lx.2resfile and Hx.2resfile, which are necessary, are not reproduced here for brevity. They represent only the header and L-chain or H-chain portions of LxHx.2resfile.

```
#begin LxHx.2resfile
```

```
NATRO
```

```
start
```

```
#L
```

```
114 L NATAA EX 1 EX 2 USE_INPUT_SC  
115 L NATAA EX 1 EX 2 USE_INPUT_SC  
116 L NATAA EX 1 EX 2 USE_INPUT_SC  
117 L NATAA EX 1 EX 2 USE_INPUT_SC  
118 L NATAA EX 1 EX 2 USE_INPUT_SC  
119 L NATAA EX 1 EX 2 USE_INPUT_SC  
120 L NATAA EX 1 EX 2 USE_INPUT_SC  
121 L NATAA EX 1 EX 2 USE_INPUT_SC  
122 L NATAA EX 1 EX 2 USE_INPUT_SC  
123 L NATAA EX 1 EX 2 USE_INPUT_SC  
124 L NATAA EX 1 EX 2 USE_INPUT_SC  
125 L NATAA EX 1 EX 2 USE_INPUT_SC  
126 L NATAA EX 1 EX 2 USE_INPUT_SC  
127 L NATAA EX 1 EX 2 USE_INPUT_SC  
129 L NATAA EX 1 EX 2 USE_INPUT_SC  
131 L NATAA EX 1 EX 2 USE_INPUT_SC  
133 L NATAA EX 1 EX 2 USE_INPUT_SC  
134 L NATAA EX 1 EX 2 USE_INPUT_SC  
135 L NATAA EX 1 EX 2 USE_INPUT_SC  
136 L NATAA EX 1 EX 2 USE_INPUT_SC  
137 L NATAA EX 1 EX 2 USE_INPUT_SC  
138 L NATAA EX 1 EX 2 USE_INPUT_SC  
158 L NATAA EX 1 EX 2 USE_INPUT_SC  
160 L NATAA EX 1 EX 2 USE_INPUT_SC  
161 L NATAA EX 1 EX 2 USE_INPUT_SC  
162 L NATAA EX 1 EX 2 USE_INPUT_SC  
163 L NATAA EX 1 EX 2 USE_INPUT_SC  
164 L NATAA EX 1 EX 2 USE_INPUT_SC  
165 L NATAA EX 1 EX 2 USE_INPUT_SC  
166 L NATAA EX 1 EX 2 USE_INPUT_SC  
167 L NATAA EX 1 EX 2 USE_INPUT_SC  
168 L NATAA EX 1 EX 2 USE_INPUT_SC  
170 L NATAA EX 1 EX 2 USE_INPUT_SC  
173 L NATAA EX 1 EX 2 USE_INPUT_SC  
174 L NATAA EX 1 EX 2 USE_INPUT_SC  
175 L NATAA EX 1 EX 2 USE_INPUT_SC  
176 L NATAA EX 1 EX 2 USE_INPUT_SC  
177 L NATAA EX 1 EX 2 USE_INPUT_SC  
178 L NATAA EX 1 EX 2 USE_INPUT_SC  
180 L NATAA EX 1 EX 2 USE_INPUT_SC
```

```
#H
```

```
120 H NATAA EX 1 EX 2 USE_INPUT_SC  
121 H NATAA EX 1 EX 2 USE_INPUT_SC  
122 H NATAA EX 1 EX 2 USE_INPUT_SC  
123 H NATAA EX 1 EX 2 USE_INPUT_SC  
124 H NATAA EX 1 EX 2 USE_INPUT_SC  
125 H NATAA EX 1 EX 2 USE_INPUT_SC  
126 H NATAA EX 1 EX 2 USE_INPUT_SC  
134 H NATAA EX 1 EX 2 USE_INPUT_SC  
137 H NATAA EX 1 EX 2 USE_INPUT_SC  
138 H NATAA EX 1 EX 2 USE_INPUT_SC
```

```
139 H NATAA EX 1 EX 2 USE_INPUT_SC
140 H NATAA EX 1 EX 2 USE_INPUT_SC
141 H NATAA EX 1 EX 2 USE_INPUT_SC
142 H NATAA EX 1 EX 2 USE_INPUT_SC
143 H NATAA EX 1 EX 2 USE_INPUT_SC
145 H NATAA EX 1 EX 2 USE_INPUT_SC
146 H NATAA EX 1 EX 2 USE_INPUT_SC
167 H NATAA EX 1 EX 2 USE_INPUT_SC
168 H NATAA EX 1 EX 2 USE_INPUT_SC
169 H NATAA EX 1 EX 2 USE_INPUT_SC
170 H NATAA EX 1 EX 2 USE_INPUT_SC
172 H NATAA EX 1 EX 2 USE_INPUT_SC
173 H NATAA EX 1 EX 2 USE_INPUT_SC
174 H NATAA EX 1 EX 2 USE_INPUT_SC
175 H NATAA EX 1 EX 2 USE_INPUT_SC
176 H NATAA EX 1 EX 2 USE_INPUT_SC
177 H NATAA EX 1 EX 2 USE_INPUT_SC
178 H NATAA EX 1 EX 2 USE_INPUT_SC
179 H NATAA EX 1 EX 2 USE_INPUT_SC
180 H NATAA EX 1 EX 2 USE_INPUT_SC
181 H NATAA EX 1 EX 2 USE_INPUT_SC
186 H NATAA EX 1 EX 2 USE_INPUT_SC
187 H NATAA EX 1 EX 2 USE_INPUT_SC
188 H NATAA EX 1 EX 2 USE_INPUT_SC
189 H NATAA EX 1 EX 2 USE_INPUT_SC
190 H NATAA EX 1 EX 2 USE_INPUT_SC
192 H NATAA EX 1 EX 2 USE_INPUT_SC
221 H NATAA EX 1 EX 2 USE_INPUT_SC
225 H NATAA EX 1 EX 2 USE_INPUT_SC
228 H NATAA EX 1 EX 2 USE_INPUT_SC
#end LxHx.2resfile
```

entity.resfile is a multistate design resfile which controls how many positions are mutable, and how they can be mutated.

```
#begin entity.resfile
9
ALLAAwc EX 1 EX 2 USE_INPUT_SC
start
#no body to the file - all 9 positions obey the header
#end entity.resfile
```

**Supplementary Protocol 3. Docking protocol.** Individual docking trajectories are very fast (order of 30s per trajectory) and are independent, so many-processor MPI is suggested.

Rosetta command line:

```
/path/to/rosetta/source/bin/rosetta_scripts.<os><mode>release @options
```

The options file consists of:

```
#begin options
#database path
-database /path/to/rosetta/database
#input path; pdblist is an endline-delimited list of paths to pdb files (one
PDB per line)
-l pdblist

#perform 2 repacks but only output the best each cycle
-ndruns 2

#allow 100 attempts to pass docking filters
-jd2:ntrials 100

#perform 750 trajectories per input
-nstruct 750

#docking settings
-docking:dock_pert 2 4

#minimization settings
-run::min_type dfpmin_armijo_nonmonotone

#packing settings
-ex1
-ex2
-use_input_sc

#scoring corrections, probably superseded by the time of publication
-no_his_his_pairE
-corrections::score::score12prime

#write the rosetta version and options to the log file
-options:user
-run:version

#this exclusion reduces memory use but is not important
-chemical:exclude_patches LowerDNA UpperDNA Cterm_amidation SpecialRotamer
protein_cutpoint_upper protein_cutpoint_lower VirtualBB ShoveBB
VirtualDNAPhosphate VirtualNTerm CTermConnect sc_orbitals
pro_hydroxylated_case1 pro_hydroxylated_case2 ser_phosphorylated
thr_phosphorylated tyr_phosphorylated tyr_sulfated lys_dimethylated
lys_monomethylated lys_trimethylated lys_acetylated glu_carboxylated
cys_acetylated tyr_diiodinated N_acetylated C_methylamidated
MethylatedProteinCterm

#output controls
-out:file:silent docking_lrf.out
```



```
-out:file:silent_struct_type binary
```

```
#quiet mode  
-mute all
```

```
#script to define docking  
-parser:protocol lrf_docking.xml  
#end options
```

The lrf\_docking.xml file controls the docking protocol.

```
#begin lrf_docking.xml  
<ROSETTASCRIPTS>  
  <SCOREFXNS>  
    <s12_prime weights="score12prime"/>  
  </SCOREFXNS>  
  <TASKOPERATIONS>  
    <RestrictToInterfaceVector name=vectorTask chain1_num=1 chain2_num=2  
CB_dist_cutoff=10.0 nearby_atom_cutoff=5.5 vector_angle_cutoff=65.0  
vector_dist_cutoff=8.0/>  
    <RestrictChainToRepacking name=repack1 chain=1/>  
    <RestrictChainToRepacking name=repack2 chain=2/>  
    <RestrictToRepacking name=repackonly/>  
    <InitializeFromCommandline name=cmdTask/>  
    <IncludeCurrent name=currentTask/>  
  </TASKOPERATIONS>  
  <FILTERS>  
    <Rmsd name=rms threshold=50.0 confidence=1/>  
  </FILTERS>  
  <MOVERS>  
    <Prepack name=prepack scorefxn=s12_prime jump_number=1 min_bb=0  
task_operations=vectorTask,repackonly,cmdTask,currentTask/>  
    <DockingProtocol name=dockprotocol docking_local_refine=1  
docking_score_high=s12_prime ignore_default_docking_task=1  
task_operations=vectorTask,repack1,repack2,cmdTask,currentTask/>  
    <TaskAwareMinMover name=minmover scorefxn=s12_prime chi=1 bb=1 jump=1  
task_operations=vectorTask,cmdTask,currentTask/>  
    <InterfaceAnalyzerMover name=fullanalyze scorefxn=score12 packstat=0  
pack_input=0 jump=1 tracer=0 use_jobname=1 resfile=0 />  
  </MOVERS>  
  <APPLY_TO_POSE>  
  </APPLY_TO_POSE>  
  <PROTOCOLS>  
    <Add mover_name=prepack/>  
    <Add mover_name=dockprotocol filter_name=rms/>  
    <Add mover_name=minmover filter_name=rms/>  
    <Add mover_name=fullanalyze/>  
  </PROTOCOLS>  
</ROSETTASCRIPTS>  
#end lrf_docking.xml
```
